# Supplementary material for: Seasonal bacterial community succession in four typical wastewater treatment plants: correlations between core microbes and process performance
Source: PubMed Central journal article supplement (PMC5854665; doi:10.1038/s41598-018-22683-1), 2018-03-15

# Seasonal bacterial community succession in 4 typical wastewater treatment plants: correlations between core microbes and process performance

Bo Zhang<sup>a</sup>, Quanwei Yu<sup>b</sup>, Guoqi Yan<sup>c</sup>, Hubo Zhu<sup>d</sup>, Xiang yang Xu<sup>a,b</sup>, Liang Zhu<sup>\*a,b</sup>

a. Department of Environmental Engineering, Zhejiang University, Hangzhou 310058, China

b. Zhejiang Province Key Laboratory for Water Pollution Control and Environmental Safety, Hangzhou 310058, China

c. Hangzhou Drainage Co., LTD, East City Water Treatment Branch, Hangzhou 310018, China

d. Shangyu Wastewater Treatment Plant, Shangyu 312369, China

\*Corresponding author: Liang Zhu

Address: Department of Environmental Engineering, Zhejiang University, No. 866 Yuhangtang Road, Hangzhou 310058, China.

Tel.: +8657188982343; Fax: +86 571 88982343

E-mail address: [felix79cn@hotmail.com](mailto:felix79cn@hotmail.com)

# Supporting material 1

Table S1: COD value of influent and effluent (mg/liter)

| Date         | QG-A2O                   |                          | SX-AO                    |                          | SX-OD                    |                          | SY-AO                    |                          |
|--------------|--------------------------|--------------------------|--------------------------|--------------------------|--------------------------|--------------------------|--------------------------|--------------------------|
|              | Influent monthly average | effluent monthly average | Influent monthly average | effluent monthly average | Influent monthly average | effluent monthly average | Influent monthly average | effluent monthly average |
| January-15   | 337.28                   | 22.56                    | 437                      | 97                       | 672                      | 92.3                     | 293.64                   | 170                      |
| February-15  | 228.06                   | 23.77                    | 386                      | 94.8                     | 1561                     | 91.6                     | 329.00                   | 169.00                   |
| March-15     | 199.54                   | 19                       | 486                      | 93.4                     | 691                      | 97                       | 355.00                   | 117.00                   |
| April-15     | 277.71                   | 27.42                    | 587                      | 105                      | 1372                     | 109                      | 322.00                   | 156.00                   |
| May-15       | 261.5                    | 19.23                    | 520                      | 111                      | 1419                     | 102                      | 306.00                   | 145.00                   |
| June-15      | 192.03                   | 18.71                    | 448                      | 95.8                     | 482                      | 89.2                     | 274.00                   | 148.00                   |
| July-15      | 217.67                   | 15.4                     | 378                      | 91.1                     | 512                      | 83.3                     | 260.00                   | 137.00                   |
| August-15    | 246                      | 21.26                    | 446                      | 95.1                     | 386                      | 95.1                     | 278.00                   | 152.00                   |
| September-15 | 292.48                   | 21.97                    | 472                      | 101                      | 448                      | 109                      | 294.00                   | 147.00                   |
| October-15   | 297                      | 23.83                    | 457                      | 96.4                     | 465                      | 85.3                     | 299.00                   | 158.00                   |
| November-15  | 265.23                   | 22.32                    | 401                      | 87.2                     | 557                      | 76.1                     | 336.00                   | 169.00                   |
| December-15  | 262.33                   | 25.61                    | 538                      | 90.1                     | 658                      | 84.3                     | 377.00                   | 188.00                   |
| January-16   | 186.36                   | 26.44                    | 493                      | 85.7                     | 855                      | 78.3                     | 465.00                   | 251.00                   |
| February-16  | 176.26                   | 19.48                    | 443                      | 83.1                     | 290                      | 68.1                     | 439.00                   | 187.00                   |
| March-16     | 332.17                   | 31.59                    | 639                      | 92.3                     | 638                      | 83.8                     | 396.00                   | 229.00                   |
| April-16     | 328.71                   | 24.97                    | 692                      | 74.9                     | 493                      | 85.4                     | 369.00                   | 211.00                   |

Table S2: Ammonia nitrogen value of influent and effluent (mg/liter)

| Date         | QG-A2O                   |                          | SX-AO                    |                          | SX-OD                    |                          | SY-AO                    |                          |
|--------------|--------------------------|--------------------------|--------------------------|--------------------------|--------------------------|--------------------------|--------------------------|--------------------------|
|              | Influent monthly average | effluent monthly average | Influent monthly average | effluent monthly average | Influent monthly average | effluent monthly average | Influent monthly average | effluent monthly average |
| January-15   | 32.46                    | 2.692                    | 59.7                     | 0.684                    | 65.3                     | 0.588                    | 38.89285714              | 5.75                     |
| February-15  | 24.41                    | 0.455                    | 43.8                     | 0.661                    | 53.6                     | 3.79                     | 40                       | 3.24                     |
| March-15     | 21                       | 0.4                      | 45.9                     | 1.51                     | 55.7                     | 18.1                     | 31.4                     | 9.22                     |
| April-15     | 24.9                     | 0.6                      | 65                       | 2.55                     | 72.8                     | 1.04                     | 34                       | 2.45                     |
| May-15       | 25.58                    | 0.53                     | 71.1                     | 1.56                     | 74.7                     | 0.926                    | 33.5                     | 2.31                     |
| June-15      | 19.7                     | 0.27                     | 58                       | 1.43                     | 65.4                     | 1.3                      | 28.6                     | 2.06                     |
| July-15      | 19.37                    | 0.6                      | 52.4                     | 1.18                     | 57.3                     | 3.67                     | 23.2                     | 2.28                     |
| August-15    | 21.2                     | 0.358                    | 54.9                     | 0.933                    | 57.3                     | 1.94                     | 27                       | 2.67                     |
| September-15 | 25.3                     | 0.197                    | 49.9                     | 1.05                     | 59.2                     | 1.43                     | 24.7                     | 2.14                     |
| October-15   | 25.73                    | 0.16                     | 52.2                     | 1.51                     | 65.7                     | 1.43                     | 22                       | 2.14                     |
| November-15  | 26.76                    | 0.458                    | 51                       | 0.758                    | 58.7                     | 1.12                     | 18.6                     | 1.96                     |
| December-15  | 28.6                     | 0.83                     | 66.2                     | 8.91                     | 66.9                     | 1.08                     | 21.2                     | 2.89                     |
| January-16   | 21.3                     | 0.3148                   | 61.3                     | 1.25                     | 72.5                     | 1.87                     | 29.7                     | 26.9                     |
| February-16  | 20.78                    | 1.058                    | 57.7                     | 14.4                     | 57.1                     | 25.4                     | 45.4                     | 39.2                     |
| March-16     | 32.36                    | 2.66                     | 99.2                     | 8.97                     | 93.4                     | 2.28                     | 29.7                     | 28.7                     |
| April-16     | 30.2                     | 1.2                      | 85.1                     | 2.73                     | 102                      | 1.45                     | 35.7                     | 16.3                     |

Table S3: Total nitrogen value of influent and effluent (mg/liter)

| Date         | QG-A2O                   |                          | SX-AO                    |                          | SX-OD                    |                          | SY-AO                    |                          |
|--------------|--------------------------|--------------------------|--------------------------|--------------------------|--------------------------|--------------------------|--------------------------|--------------------------|
|              | Influent monthly average | effluent monthly average | Influent monthly average | effluent monthly average | Influent monthly average | effluent monthly average | Influent monthly average | effluent monthly average |
| January-15   | 40.48                    | 11.44                    | 77.5                     | 26.7                     | 75.8                     | 50.9                     | /                        | /                        |
| February-15  | 31.35                    | 10.32                    | 53.9                     | 49                       | 75.2                     | 53.3                     | /                        | /                        |
| March-15     | 26.86                    | 10.61                    | 63.1                     | 44.2                     | 75.2                     | 37.6                     | /                        | /                        |
| April-15     | 31.81                    | 9.87                     | 78.8                     | 49.7                     | 82.8                     | 51.9                     | /                        | /                        |
| May-15       | 33.10                    | 9.57                     | 81.5                     | 55.6                     | 92.3                     | 52.9                     | /                        | /                        |
| June-15      | 24.81                    | 8.77                     | 74.1                     | 42.7                     | 73.6                     | 48.3                     | /                        | /                        |
| July-15      | 25.23                    | 8.97                     | 65.5                     | 37.2                     | 67.8                     | 37.7                     | /                        | /                        |
| August-15    | 26.42                    | 8.32                     | 68.8                     | 41                       | 70.4                     | 43.5                     | /                        | /                        |
| September-15 | 31.74                    | 9.23                     | 63.5                     | 43.6                     | 69.8                     | 26.4                     | /                        | /                        |
| October-15   | 33.27                    | 10.70                    | 65.6                     | 45.4                     | 78.7                     | 42.8                     | /                        | /                        |
| November-15  | 32.29                    | 10.29                    | 65.1                     | 36.6                     | 73.4                     | 38.5                     | /                        | /                        |
| December-15  | 34.31                    | 11.00                    | 87.3                     | 42.7                     | 87.6                     | 40.1                     | /                        | /                        |
| January-16   | 26.56                    | 10.76                    | 67.6                     | 48.5                     | 86.5                     | 53.7                     | /                        | /                        |
| February-16  | 24.42                    | 10.55                    | 57.7                     | /                        | 64.1                     | 49                       | /                        | /                        |
| March-16     | 37.79                    | 11.21                    | 126                      | 65.2                     | 112                      | 50.8                     | /                        | /                        |
| April-16     | 37.10                    | 11.35                    | 106                      | 56                       | 118                      | 58.8                     | /                        | /                        |

Table S4: Total phosphate content of influent and effluent (mg/liter)

| Date         | QG-A2O                   |                          | SX-AO                    |                          | SX-OD                    |                          | SY-AO                    |                          |
|--------------|--------------------------|--------------------------|--------------------------|--------------------------|--------------------------|--------------------------|--------------------------|--------------------------|
|              | Influent monthly average | effluent monthly average | Influent monthly average | effluent monthly average | Influent monthly average | effluent monthly average | Influent monthly average | effluent monthly average |
| January-15   | 2.80                     | 0.26                     | 6.74                     | 0.145                    | 5.26                     | 0.046                    | 7.47                     | 6.38                     |
| February-15  | 2.46                     | 0.28                     | 4.99                     | 0.481                    | 4.51                     | 0.36                     | 7.01                     | 5.95                     |
| March-15     | 2.20                     | 0.30                     | 5.2                      | 0.465                    | 4.58                     | 0.294                    | 8.66                     | 4.80                     |
| April-15     | 2.51                     | 0.32                     | 3.36                     | 0.28                     | 3.06                     | 0.204                    | 7.21                     | 4.58                     |
| May-15       | 2.71                     | 0.23                     | 4.16                     | 0.343                    | 3.61                     | 0.051                    | 6.22                     | 4.50                     |
| June-15      | 2.39                     | 0.28                     | 4.78                     | 0.242                    | 4.51                     | 0.104                    | 6.50                     | 5.20                     |
| July-15      | 2.32                     | 0.28                     | 3.35                     | 0.191                    | 3.56                     | 0.176                    | 6.45                     | 5.23                     |
| August-15    | 2.42                     | 0.31                     | 2.76                     | 0.254                    | 2.93                     | 0.107                    | 8.41                     | 6.21                     |
| September-15 | 2.82                     | 0.35                     | 2.92                     | 0.227                    | 2.9                      | 0.114                    | 14.70                    | 12.70                    |
| October-15   | 2.88                     | 0.35                     | 3.34                     | 0.072                    | 2.7                      | 0.033                    | 15.00                    | 15.70                    |
| November-15  | 2.64                     | 0.30                     | 2.6                      | 0.091                    | 3.06                     | 0.066                    | 17.40                    | 12.00                    |
| December-15  | 2.54                     | 0.41                     | 3.8                      | 0.1                      | 4.12                     | 0.07                     | 16.10                    | 15.30                    |
| January-16   | 2.20                     | 0.35                     | 4.07                     | 0.158                    | 5.13                     | 0.039                    | 20.60                    | 17.90                    |
| February-16  | 2.12                     | 0.36                     | 9.12                     | /                        | 4.14                     | 0.06                     | 19.90                    | 10.00                    |
| March-16     | 2.78                     | 0.45                     | 4.23                     | 0.321                    | 5.5                      | 0.119                    | 15.70                    | 13.00                    |
| April-16     | 2.79                     | 0.26                     | 4.66                     | 0.127                    | 3.73                     | 0.353                    | 10.90                    | 10.00                    |

## Supporting material 2

**Table S5: Activated sludge bacterial community composition at the phylum level (%)**

| TaxonName     | QG(Ano) | QG(Ana) | QG(O)  | SX-1-(A) | SX-1-(O) | SX.2.OD | SY(A)  | SY(O)  |
|---------------|---------|---------|--------|----------|----------|---------|--------|--------|
| Proteobacter  | 31.50%  | 28.23%  | 22.01% | 63.19%   | 49.42%   | 20.33%  | 12.63% | 18.68% |
| Acidobacteri  | 5.99%   | 15.51%  | 11.38% | 1.93%    | 5.93%    | 2.45%   | 29.96% | 33.00% |
| Chloroflexi   | 38.32%  | 27.56%  | 35.04% | 11.23%   | 6.19%    | 5.60%   | 7.71%  | 8.20%  |
| Nitrospirae   | 2.69%   | 3.13%   | 3.28%  | 0.31%    | 1.20%    | 51.36%  | 1.83%  | 3.19%  |
| Bacteroidetes | 4.53%   | 8.96%   | 7.50%  | 2.67%    | 20.39%   | 8.15%   | 5.61%  | 0.78%  |
| SBR1093       | 0.16%   | 0.24%   | 0.12%  | 4.01%    | 4.33%    | 8.18%   | 12.27% | 21.93% |
| Firmicutes    | 1.91%   | 0.90%   | 6.20%  | 1.71%    | 1.08%    | 0.39%   | 18.36% | 0.19%  |
| Actinobacter  | 9.75%   | 5.93%   | 6.28%  | 1.57%    | 2.34%    | 1.17%   | 2.90%  | 3.53%  |
| Thermi        | 0.03%   | 0.14%   | 0.04%  | 0.04%    | 0.06%    | 0.20%   | 6.26%  | 8.20%  |
| TM7           | 2.28%   | 5.35%   | 4.59%  | 0.09%    | 1.32%    | 1.35%   | 0.30%  | 0.31%  |
| WS3           | 0.15%   | 0.39%   | 0.11%  | 5.44%    | 1.63%    | 0.02%   | 0.18%  | 0.08%  |
| Synergistetes | 0.48%   | 0.33%   | 1.05%  | 6.09%    | 1.04%    | 0.04%   | 0.03%  | 0.02%  |
| Gemmatimon    | 0.54%   | 1.45%   | 0.62%  | 0.04%    | 0.53%    | 0.21%   | 1.27%  | 1.50%  |
| Planctomyces  | 0.24%   | 0.41%   | 0.61%  | 0.41%    | 1.25%    | 0.05%   | 0.19%  | 0.05%  |
| WPS-2         | 0.54%   | 0.74%   | 0.65%  | 0.13%    | 1.07%    | 0.01%   | 0.00%  | 0.02%  |
| Chlorobi      | 0.46%   | 0.38%   | 0.19%  | 0.38%    | 0.55%    | 0.24%   | 0.12%  | 0.11%  |
| Cyanobacteri  | 0.06%   | 0.04%   | 0.03%  | 0.10%    | 0.59%    | 0.08%   | 0.23%  | 0.10%  |
| Verrucomicro  | 0.07%   | 0.05%   | 0.06%  | 0.17%    | 0.22%    | 0.00%   | 0.05%  | 0.01%  |
| FBP           | 0.00%   | 0.00%   | 0.00%  | 0.07%    | 0.19%    | 0.01%   | 0.00%  | 0.00%  |
| Spirochaetes  | 0.02%   | 0.04%   | 0.01%  | 0.35%    | 0.27%    | 0.00%   | 0.01%  | 0.02%  |
| Armatimonad   | 0.00%   | 0.02%   | 0.01%  | 0.02%    | 0.16%    | 0.08%   | 0.00%  | 0.00%  |
| TM6           | 0.03%   | 0.05%   | 0.02%  | 0.02%    | 0.01%    | 0.03%   | 0.02%  | 0.04%  |
| BRC1          | 0.00%   | 0.00%   | 0.00%  | 0.01%    | 0.12%    | 0.02%   | 0.00%  | 0.00%  |
| OP8           | 0.03%   | 0.02%   | 0.10%  | 0.00%    | 0.00%    | 0.00%   | 0.00%  | 0.00%  |
| Chlamydiae    | 0.02%   | 0.01%   | 0.02%  | 0.00%    | 0.00%    | 0.00%   | 0.05%  | 0.02%  |
| WS6           | 0.06%   | 0.01%   | 0.03%  | 0.00%    | 0.00%    | 0.00%   | 0.02%  | 0.00%  |
| OD1           | 0.04%   | 0.05%   | 0.01%  | 0.00%    | 0.00%    | 0.00%   | 0.00%  | 0.00%  |
| NKB19         | 0.01%   | 0.00%   | 0.00%  | 0.00%    | 0.02%    | 0.00%   | 0.00%  | 0.02%  |
| SR1           | 0.02%   | 0.03%   | 0.02%  | 0.00%    | 0.00%    | 0.00%   | 0.00%  | 0.00%  |
| OC31          | 0.00%   | 0.00%   | 0.00%  | 0.00%    | 0.03%    | 0.00%   | 0.00%  | 0.00%  |
| OP9           | 0.00%   | 0.00%   | 0.00%  | 0.01%    | 0.02%    | 0.00%   | 0.00%  | 0.00%  |
| GN04          | 0.02%   | 0.04%   | 0.01%  | 0.00%    | 0.00%    | 0.00%   | 0.00%  | 0.00%  |
| Elusimicrobia | 0.02%   | 0.00%   | 0.00%  | 0.00%    | 0.00%    | 0.00%   | 0.00%  | 0.01%  |
| Lentisphaera  | 0.00%   | 0.00%   | 0.00%  | 0.00%    | 0.02%    | 0.00%   | 0.00%  | 0.00%  |
| WS2           | 0.02%   | 0.00%   | 0.00%  | 0.00%    | 0.00%    | 0.00%   | 0.00%  | 0.00%  |
| GOUTA4        | 0.00%   | 0.00%   | 0.00%  | 0.00%    | 0.00%    | 0.00%   | 0.00%  | 0.00%  |
| Fusobacteria  | 0.00%   | 0.01%   | 0.00%  | 0.00%    | 0.00%    | 0.00%   | 0.00%  | 0.00%  |
| MVP-21        | 0.00%   | 0.00%   | 0.00%  | 0.00%    | 0.00%    | 0.00%   | 0.00%  | 0.00%  |
| GN02          | 0.00%   | 0.01%   | 0.01%  | 0.00%    | 0.00%    | 0.00%   | 0.00%  | 0.00%  |

**Table S6: Activated sludge bacterial community composition at the class level (%)**

| TaxonName           | QG(Ano) | QG(Ana) | QG(O)  | SX-1-<br>(A) | SX-1-(O) | SX.2.OD | SY(A)  | SY(O)  |
|---------------------|---------|---------|--------|--------------|----------|---------|--------|--------|
| Betaproteobacteria  | 7.85%   | 10.38%  | 6.01%  | 38.06%       | 23.18%   | 7.35%   | 5.27%  | 8.83%  |
| Chloracidobacteria  | 2.29%   | 7.73%   | 5.14%  | 0.66%        | 2.16%    | 0.67%   | 25.89% | 28.64% |
| Nitrospira          | 3.71%   | 4.72%   | 4.68%  | 0.44%        | 1.55%    | 65.16%  | 1.69%  | 2.93%  |
| Alphaproteobacteria | 9.90%   | 6.22%   | 6.44%  | 5.75%        | 11.43%   | 4.44%   | 4.67%  | 6.50%  |
| VHS-B5-50           | 0.11%   | 0.18%   | 0.09%  | 3.57%        | 4.04%    | 5.19%   | 11.28% | 19.99% |
| Anaerolineae        | 16.79%  | 16.79%  | 19.76% | 0.16%        | 0.50%    | 0.80%   | 1.06%  | 1.18%  |
| Thermomicrobia      | 7.74%   | 0.52%   | 1.92%  | 9.67%        | 3.96%    | 1.56%   | 2.88%  | 3.62%  |
| Gammaproteobacteria | 3.46%   | 3.75%   | 2.68%  | 10.34%       | 9.80%    | 0.92%   | 0.85%  | 1.22%  |
| Sphingobacteriia    | 1.01%   | 1.30%   | 0.52%  | 0.58%        | 11.59%   | 4.09%   | 0.02%  | 0.03%  |
| Saprospirae         | 1.50%   | 4.44%   | 2.44%  | 0.25%        | 6.20%    | 0.74%   | 0.29%  | 0.41%  |
| Clostridia          | 1.04%   | 0.61%   | 3.68%  | 1.28%        | 0.71%    | 0.21%   | 16.35% | 0.13%  |
| Acidobacteria-6     | 1.37%   | 3.53%   | 2.64%  | 0.16%        | 2.33%    | 0.78%   | 1.43%  | 1.17%  |
| TK17                | 1.62%   | 2.73%   | 2.65%  | 0.13%        | 1.04%    | 0.80%   | 2.36%  | 2.00%  |
| Deinococci          | 0.02%   | 0.10%   | 0.03%  | 0.03%        | 0.06%    | 0.13%   | 5.75%  | 7.48%  |
| TM7-1               | 1.19%   | 2.80%   | 2.27%  | 0.06%        | 1.21%    | 0.82%   | 0.11%  | 0.11%  |
| Acidimicrobiia      | 2.71%   | 2.10%   | 1.87%  | 0.79%        | 1.39%    | 0.34%   | 0.07%  | 0.14%  |
| PRR-12              | 0.10%   | 0.29%   | 0.08%  | 4.84%        | 1.52%    | 0.01%   | 0.16%  | 0.07%  |
| Actinobacteria      | 6.72%   | 4.47%   | 4.49%  | 1.40%        | 2.19%    | 0.74%   | 2.66%  | 3.22%  |
| Bacteroidia         | 0.38%   | 0.29%   | 1.90%  | 1.46%        | 0.77%    | 0.19%   | 4.69%  | 0.06%  |
| Synergistia         | 0.33%   | 0.25%   | 0.75%  | 5.42%        | 0.97%    | 0.03%   | 0.03%  | 0.02%  |

|                       |        |        |        |        |       |       |       |       |
|-----------------------|--------|--------|--------|--------|-------|-------|-------|-------|
| Deltaproteobacteria   | 0.47%  | 0.89%  | 0.48%  | 1.89%  | 1.57% | 0.18% | 0.48% | 0.45% |
| Gemm-1                | 0.28%  | 0.70%  | 0.26%  | 0.04%  | 0.25% | 0.09% | 0.95% | 1.18% |
| Flavobacteriia        | 0.21%  | 0.64%  | 0.48%  | 0.07%  | 0.32% | 0.09% | 0.14% | 0.20% |
| Bacilli               | 0.28%  | 0.06%  | 0.62%  | 0.24%  | 0.30% | 0.04% | 0.42% | 0.04% |
| S085                  | 0.01%  | 0.07%  | 0.04%  | 0.01%  | 0.03% | 0.11% | 0.60% | 0.57% |
| iii1-8                | 0.06%  | 0.13%  | 0.08%  | 0.66%  | 0.73% | 0.00% | 0.00% | 0.01% |
| Ignavibacteria        | 0.13%  | 0.11%  | 0.06%  | 0.31%  | 0.38% | 0.12% | 0.11% | 0.10% |
| Solibacteres          | 0.06%  | 0.15%  | 0.04%  | 0.23%  | 0.30% | 0.08% | 0.13% | 0.25% |
| 4C0d-2                | 0.02%  | 0.01%  | 0.01%  | 0.09%  | 0.50% | 0.05% | 0.19% | 0.09% |
| Planctomycetia        | 0.10%  | 0.18%  | 0.37%  | 0.15%  | 0.42% | 0.00% | 0.06% | 0.01% |
| TM7-3                 | 0.22%  | 0.20%  | 0.28%  | 0.01%  | 0.02% | 0.02% | 0.16% | 0.17% |
| OM190                 | 0.05%  | 0.04%  | 0.04%  | 0.08%  | 0.53% | 0.00% | 0.04% | 0.02% |
| SC3                   | 0.07%  | 0.67%  | 0.47%  | 0.00%  | 0.00% | 0.00% | 0.00% | 0.00% |
| Ellin6529             | 0.09%  | 0.12%  | 0.08%  | 0.02%  | 0.03% | 0.08% | 0.14% | 0.06% |
| Sva0725               | 0.67%  | 0.28%  | 0.47%  | 0.00%  | 0.00% | 0.04% | 0.00% | 0.00% |
| TA18                  | 0.02%  | 0.04%  | 0.09%  | 0.01%  | 0.04% | 0.02% | 0.08% | 0.04% |
| Gemmatimonadetes      | 0.37%  | 1.09%  | 0.45%  | 0.04%  | 0.50% | 0.13% | 1.16% | 1.37% |
| TK10                  | 0.04%  | 0.01%  | 0.05%  | 0.01%  | 0.15% | 0.09% | 0.04% | 0.04% |
| Epsilonproteobacteria | 0.00%  | 0.00%  | 0.05%  | 0.22%  | 0.07% | 0.00% | 0.26% | 0.00% |
| Cytophagia            | 0.02%  | 0.08%  | 0.01%  | 0.01%  | 0.09% | 0.06% | 0.01% | 0.01% |
| SJA-28                | 0.17%  | 0.06%  | 0.04%  | 0.00%  | 0.03% | 0.03% | 0.00% | 0.00% |
| Phycisphaerae         | 0.01%  | 0.01%  | 0.00%  | 0.11%  | 0.03% | 0.03% | 0.06% | 0.02% |
| Gitt-GS-136           | 0.00%  | 0.00%  | 0.00%  | 0.00%  | 0.00% | 0.08% | 0.00% | 0.00% |
| Chloroflexi           | 26.40% | 20.77% | 25.07% | 10.00% | 5.78% | 3.56% | 7.08% | 7.48% |
| C6                    | 0.01%  | 0.07%  | 0.03%  | 0.02%  | 0.11% | 0.00% | 0.00% | 0.00% |

|                  |       |       |       |       |       |       |       |       |
|------------------|-------|-------|-------|-------|-------|-------|-------|-------|
| Thermoleophilia  | 0.01% | 0.02% | 0.03% | 0.07% | 0.03% | 0.01% | 0.00% | 0.02% |
| 0319-6E2         | 0.00% | 0.00% | 0.00% | 0.02% | 0.15% | 0.02% | 0.00% | 0.00% |
| NPL-UPA2         | 0.00% | 0.00% | 0.00% | 0.01% | 0.11% | 0.01% | 0.00% | 0.00% |
| OPB56            | 0.00% | 0.09% | 0.03% | 0.02% | 0.11% | 0.00% | 0.00% | 0.00% |
| SJA-4            | 0.02% | 0.03% | 0.01% | 0.02% | 0.01% | 0.02% | 0.02% | 0.04% |
| Spirochaetes     | 0.02% | 0.03% | 0.00% | 0.32% | 0.25% | 0.00% | 0.01% | 0.02% |
| Verruco-5        | 0.00% | 0.00% | 0.00% | 0.14% | 0.06% | 0.00% | 0.00% | 0.00% |
| Leptospirae      | 0.02% | 0.03% | 0.00% | 0.05% | 0.09% | 0.00% | 0.01% | 0.02% |
| Erysipelotrichi  | 0.00% | 0.00% | 0.14% | 0.00% | 0.00% | 0.00% | 0.10% | 0.00% |
| Verrucomicrobiae | 0.05% | 0.03% | 0.05% | 0.00% | 0.00% | 0.00% | 0.05% | 0.01% |
| Coriobacteriia   | 0.08% | 0.01% | 0.04% | 0.00% | 0.01% | 0.00% | 0.01% | 0.00% |
| BD7-11           | 0.00% | 0.00% | 0.00% | 0.00% | 0.06% | 0.00% | 0.01% | 0.00% |
| Fimbriimonadia   | 0.00% | 0.01% | 0.01% | 0.00% | 0.00% | 0.04% | 0.00% | 0.00% |
| Acidobacteriia   | 0.01% | 0.01% | 0.01% | 0.00% | 0.00% | 0.01% | 0.06% | 0.01% |
| Chlamydiia       | 0.02% | 0.01% | 0.01% | 0.00% | 0.00% | 0.00% | 0.05% | 0.02% |
| Chloroplast      | 0.02% | 0.00% | 0.00% | 0.00% | 0.05% | 0.00% | 0.03% | 0.00% |
| SC72             | 0.04% | 0.00% | 0.02% | 0.00% | 0.00% | 0.00% | 0.01% | 0.00% |
| VC2_1_Bac22      | 0.00% | 0.01% | 0.00% | 0.01% | 0.06% | 0.00% | 0.00% | 0.00% |
| Pedosphaerae     | 0.00% | 0.00% | 0.00% | 0.02% | 0.05% | 0.00% | 0.00% | 0.00% |
| Spartobacteria   | 0.00% | 0.00% | 0.00% | 0.00% | 0.07% | 0.00% | 0.00% | 0.00% |
| OPB41            | 0.05% | 0.00% | 0.00% | 0.00% | 0.00% | 0.00% | 0.00% | 0.00% |
| TSBW08           | 0.00% | 0.00% | 0.00% | 0.00% | 0.01% | 0.00% | 0.00% | 0.02% |
| GN15             | 0.01% | 0.03% | 0.00% | 0.00% | 0.00% | 0.00% | 0.00% | 0.00% |
| Elusimicrobia    | 0.02% | 0.00% | 0.00% | 0.00% | 0.00% | 0.00% | 0.00% | 0.01% |
| JS1              | 0.00% | 0.00% | 0.00% | 0.00% | 0.02% | 0.00% | 0.00% | 0.00% |

|                   |       |       |       |       |       |       |       |       |
|-------------------|-------|-------|-------|-------|-------|-------|-------|-------|
| ML635J-21         | 0.01% | 0.01% | 0.01% | 0.00% | 0.00% | 0.00% | 0.00% | 0.00% |
| DA052             | 0.00% | 0.00% | 0.00% | 0.01% | 0.00% | 0.00% | 0.01% | 0.01% |
| SM2F11            | 0.00% | 0.03% | 0.00% | 0.00% | 0.00% | 0.00% | 0.00% | 0.00% |
| Lentisphaeria     | 0.00% | 0.00% | 0.00% | 0.00% | 0.02% | 0.00% | 0.00% | 0.00% |
| BSV26             | 0.01% | 0.01% | 0.00% | 0.00% | 0.00% | 0.00% | 0.00% | 0.00% |
| Methylacidiphilae | 0.00% | 0.00% | 0.00% | 0.00% | 0.02% | 0.00% | 0.00% | 0.00% |
| ZB2               | 0.00% | 0.00% | 0.00% | 0.00% | 0.00% | 0.00% | 0.00% | 0.00% |
| SHA-109           | 0.02% | 0.00% | 0.00% | 0.00% | 0.00% | 0.00% | 0.00% | 0.00% |
| SBRH58            | 0.01% | 0.01% | 0.00% | 0.00% | 0.00% | 0.00% | 0.00% | 0.00% |
| Holophagae        | 0.00% | 0.00% | 0.00% | 0.00% | 0.01% | 0.00% | 0.00% | 0.00% |
| OP8_1             | 0.00% | 0.00% | 0.00% | 0.00% | 0.00% | 0.00% | 0.00% | 0.00% |
| MVP-15            | 0.00% | 0.00% | 0.00% | 0.01% | 0.00% | 0.00% | 0.00% | 0.00% |
| BD1-5             | 0.00% | 0.01% | 0.00% | 0.00% | 0.00% | 0.00% | 0.00% | 0.00% |
| Gemm-5            | 0.00% | 0.00% | 0.00% | 0.00% | 0.00% | 0.00% | 0.00% | 0.00% |
| Fusobacteriia     | 0.00% | 0.01% | 0.00% | 0.00% | 0.00% | 0.00% | 0.00% | 0.00% |
| MB-A2-108         | 0.00% | 0.00% | 0.01% | 0.00% | 0.00% | 0.00% | 0.00% | 0.00% |
| OPB46             | 0.00% | 0.00% | 0.00% | 0.00% | 0.00% | 0.00% | 0.00% | 0.00% |
| B142              | 0.00% | 0.01% | 0.00% | 0.00% | 0.00% | 0.00% | 0.01% | 0.00% |

**Table S7: Activated sludge bacterial community composition at the order level (%)**

| TaxonName     | QG(Ano) | QG(Ana) | QG(O) | SX-1- | SX-1-(O) | SX.2.OD | SY(A)  | SY(O)  |
|---------------|---------|---------|-------|-------|----------|---------|--------|--------|
|               |         |         |       | (A)   |          |         |        |        |
| Nitrospirales | 2.93%   | 3.59%   | 3.69% | 0.34% | 1.34%    | 58.20%  | 2.25%  | 4.49%  |
| RB41          | 3.57%   | 10.43%  | 7.30% | 0.82% | 2.55%    | 1.20%   | 34.68% | 44.19% |

|                    |        |        |        |        |        |       |        |        |
|--------------------|--------|--------|--------|--------|--------|-------|--------|--------|
| Burkholderiales    | 6.21%  | 9.39%  | 5.69%  | 17.76% | 15.89% | 7.10% | 4.14%  | 6.98%  |
| Sphingobacteriales | 1.60%  | 1.98%  | 0.82%  | 0.72%  | 13.84% | 7.31% | 0.03%  | 0.04%  |
| AKYG1722           | 10.35% | 0.33%  | 2.04%  | 10.14% | 4.17%  | 2.74% | 3.09%  | 4.74%  |
| Rhizobiales        | 6.73%  | 4.00%  | 4.35%  | 2.93%  | 5.17%  | 4.66% | 2.01%  | 3.51%  |
| Hydrogenophilales  | 0.07%  | 0.03%  | 0.01%  | 12.72% | 2.18%  | 0.38% | 1.88%  | 4.41%  |
| Xanthomonadales    | 1.42%  | 2.46%  | 1.31%  | 11.64% | 9.23%  | 0.65% | 0.56%  | 0.92%  |
| Caldilineales      | 11.20% | 6.99%  | 14.98% | 0.13%  | 0.47%  | 0.61% | 0.01%  | 0.06%  |
| Saprospirales      | 2.37%  | 6.74%  | 3.84%  | 0.31%  | 7.40%  | 1.32% | 0.39%  | 0.63%  |
| Clostridiales      | 1.64%  | 0.93%  | 5.78%  | 1.60%  | 0.85%  | 0.38% | 21.90% | 0.20%  |
| SHA-20             | 8.50%  | 12.88% | 9.66%  | 0.01%  | 0.00%  | 0.01% | 0.00%  | 0.00%  |
| Rhodocyclales      | 2.64%  | 2.33%  | 1.09%  | 7.09%  | 2.77%  | 1.71% | 0.25%  | 0.72%  |
| iii1-15            | 1.45%  | 3.74%  | 2.98%  | 0.20%  | 2.78%  | 1.38% | 1.92%  | 1.81%  |
| Deinococcales      | 0.03%  | 0.13%  | 0.02%  | 0.03%  | 0.04%  | 0.23% | 7.70%  | 11.54% |
| Rhodospirillales   | 3.41%  | 1.33%  | 2.19%  | 1.83%  | 2.49%  | 0.99% | 1.11%  | 1.68%  |
| Rhodobacterales    | 2.64%  | 2.63%  | 2.14%  | 1.12%  | 2.89%  | 0.94% | 1.03%  | 1.40%  |
| mle1-48            | 2.50%  | 3.74%  | 3.74%  | 0.10%  | 0.87%  | 0.93% | 0.89%  | 0.92%  |
| Acidimicrobiales   | 4.30%  | 3.20%  | 2.94%  | 0.98%  | 1.66%  | 0.61% | 0.10%  | 0.22%  |
| Bacteroidales      | 0.61%  | 0.44%  | 2.98%  | 1.82%  | 0.92%  | 0.34% | 6.28%  | 0.10%  |
| ASSO-13            | 0.06%  | 0.03%  | 0.04%  | 2.73%  | 1.34%  | 2.39% | 0.16%  | 0.13%  |
| Synergistales      | 0.53%  | 0.38%  | 1.18%  | 6.75%  | 1.16%  | 0.05% | 0.04%  | 0.02%  |
| Actinomycetales    | 2.99%  | 1.71%  | 1.82%  | 0.31%  | 0.44%  | 0.34% | 1.68%  | 2.34%  |
| Ellin6067          | 0.99%  | 1.07%  | 0.54%  | 1.17%  | 2.64%  | 0.56% | 0.50%  | 1.12%  |
| GN03               | 0.04%  | 0.03%  | 0.01%  | 6.03%  | 1.82%  | 0.01% | 0.22%  | 0.11%  |
| Sphingomonadales   | 2.06%  | 0.83%  | 1.05%  | 0.91%  | 1.78%  | 0.44% | 0.63%  | 1.22%  |
| SBR1031            | 1.61%  | 1.02%  | 1.24%  | 0.01%  | 0.10%  | 0.62% | 1.41%  | 1.75%  |



|                     |       |       |       |       |       |       |       |       |
|---------------------|-------|-------|-------|-------|-------|-------|-------|-------|
| JG30-KF-CM45        | 1.90% | 0.45% | 0.99% | 1.88% | 0.55% | 0.05% | 0.77% | 0.84% |
| SC-I-84             | 1.39% | 2.19% | 1.33% | 0.19% | 0.39% | 0.36% | 0.00% | 0.01% |
| HOC36               | 2.05% | 1.59% | 1.30% | 0.21% | 0.40% | 0.05% | 0.00% | 0.00% |
| SJA-15              | 2.22% | 1.22% | 1.52% | 0.00% | 0.00% | 0.00% | 0.00% | 0.00% |
| Flavobacteriales    | 0.34% | 0.98% | 0.76% | 0.08% | 0.38% | 0.16% | 0.19% | 0.31% |
| Legionellales       | 0.36% | 0.17% | 0.12% | 0.15% | 0.75% | 0.55% | 0.07% | 0.14% |
| Nitrosomonadales    | 0.03% | 0.03% | 0.01% | 0.36% | 1.31% | 0.27% | 0.08% | 0.17% |
| Chromatiales        | 0.63% | 0.41% | 0.19% | 0.08% | 0.32% | 0.13% | 0.24% | 0.50% |
| CCU21               | 0.72% | 1.62% | 1.17% | 0.00% | 0.00% | 0.00% | 0.00% | 0.00% |
| Lactobacillales     | 0.44% | 0.10% | 0.98% | 0.28% | 0.32% | 0.03% | 0.55% | 0.07% |
| Myxococcales        | 0.41% | 1.00% | 0.29% | 0.01% | 0.34% | 0.07% | 0.07% | 0.12% |
| SJA-36              | 0.09% | 0.20% | 0.13% | 0.82% | 0.87% | 0.00% | 0.00% | 0.00% |
| Ignavibacteriales   | 0.20% | 0.17% | 0.09% | 0.39% | 0.45% | 0.22% | 0.14% | 0.15% |
| Solibacterales      | 0.09% | 0.23% | 0.06% | 0.29% | 0.36% | 0.14% | 0.17% | 0.38% |
| S0208               | 0.04% | 0.21% | 0.04% | 0.01% | 0.01% | 0.16% | 0.00% | 0.00% |
| Alteromonadales     | 0.45% | 0.75% | 0.42% | 0.10% | 0.22% | 0.03% | 0.08% | 0.17% |
| Anaerolineales      | 1.65% | 0.20% | 0.37% | 0.00% | 0.02% | 0.00% | 0.00% | 0.00% |
| MLE1-12             | 0.01% | 0.02% | 0.01% | 0.11% | 0.59% | 0.09% | 0.23% | 0.14% |
| Desulfobacterales   | 0.06% | 0.05% | 0.19% | 1.00% | 0.37% | 0.01% | 0.00% | 0.01% |
| Sediment-1          | 0.13% | 0.41% | 0.11% | 0.00% | 0.00% | 0.01% | 0.00% | 0.00% |
| Caulobacterales     | 0.28% | 0.08% | 0.09% | 0.15% | 0.34% | 0.06% | 0.23% | 0.40% |
| Syntrophobacterales | 0.17% | 0.11% | 0.09% | 0.08% | 0.06% | 0.18% | 0.29% | 0.41% |
| Kiloniellales       | 0.05% | 0.07% | 0.02% | 0.12% | 0.35% | 0.15% | 0.09% | 0.07% |
| Pseudomonadales     | 0.25% | 0.03% | 0.24% | 0.43% | 0.23% | 0.03% | 0.04% | 0.05% |
| CL500-15            | 0.08% | 0.05% | 0.04% | 0.10% | 0.64% | 0.00% | 0.00% | 0.02% |

|                    |       |       |       |       |       |       |       |       |
|--------------------|-------|-------|-------|-------|-------|-------|-------|-------|
| Sva0725            | 1.06% | 0.42% | 0.73% | 0.00% | 0.00% | 0.08% | 0.00% | 0.00% |
| DS-100             | 0.02% | 1.20% | 0.67% | 0.00% | 0.00% | 0.00% | 0.00% | 0.00% |
| Desulfuromonadales | 0.00% | 0.00% | 0.00% | 0.59% | 0.45% | 0.00% | 0.00% | 0.00% |
| Desulfovibrionales | 0.01% | 0.03% | 0.11% | 0.59% | 0.08% | 0.00% | 0.23% | 0.01% |
| A31                | 0.05% | 0.47% | 0.86% | 0.00% | 0.00% | 0.00% | 0.00% | 0.00% |
| B97                | 0.04% | 0.13% | 0.16% | 0.11% | 0.40% | 0.00% | 0.09% | 0.01% |
| AKYG885            | 0.06% | 0.02% | 0.08% | 0.01% | 0.18% | 0.16% | 0.05% | 0.06% |
| Ellin329           | 0.04% | 0.03% | 0.01% | 0.04% | 0.10% | 0.06% | 0.07% | 0.09% |
| H39                | 0.19% | 0.48% | 0.37% | 0.00% | 0.00% | 0.02% | 0.00% | 0.00% |
| Gemmatales         | 0.12% | 0.15% | 0.42% | 0.07% | 0.11% | 0.00% | 0.00% | 0.00% |
| Campylobacterales  | 0.00% | 0.00% | 0.07% | 0.28% | 0.09% | 0.01% | 0.35% | 0.00% |
| Bdellovibrionales  | 0.07% | 0.06% | 0.03% | 0.02% | 0.24% | 0.02% | 0.05% | 0.09% |
| Methylococcales    | 0.14% | 0.11% | 0.24% | 0.00% | 0.00% | 0.13% | 0.00% | 0.00% |
| CV90               | 0.02% | 0.05% | 0.11% | 0.00% | 0.04% | 0.01% | 0.04% | 0.02% |
| Cytophagales       | 0.03% | 0.13% | 0.02% | 0.01% | 0.11% | 0.12% | 0.01% | 0.01% |
| Rickettsiales      | 0.09% | 0.10% | 0.04% | 0.01% | 0.05% | 0.15% | 0.02% | 0.01% |
| Oceanospirillales  | 0.06% | 0.02% | 0.01% | 0.04% | 0.28% | 0.01% | 0.05% | 0.08% |
| BD7-3              | 0.00% | 0.00% | 0.00% | 0.03% | 0.29% | 0.02% | 0.04% | 0.05% |
| Phycisphaerales    | 0.01% | 0.02% | 0.00% | 0.13% | 0.04% | 0.06% | 0.09% | 0.03% |
| Thiotrichales      | 0.05% | 0.08% | 0.16% | 0.01% | 0.07% | 0.01% | 0.06% | 0.01% |
| GCA004             | 0.37% | 0.08% | 0.17% | 0.00% | 0.00% | 0.00% | 0.00% | 0.00% |
| PYR10d3            | 0.01% | 0.00% | 0.00% | 0.09% | 0.16% | 0.02% | 0.02% | 0.01% |
| Roseiflexales      | 0.03% | 0.24% | 0.09% | 0.00% | 0.04% | 0.03% | 0.00% | 0.00% |
| PHOS-HD29          | 0.02% | 0.01% | 0.03% | 0.00% | 0.02% | 0.03% | 0.07% | 0.04% |
| d113               | 0.01% | 0.11% | 0.05% | 0.03% | 0.14% | 0.00% | 0.00% | 0.00% |

|                     |       |       |       |       |       |       |       |       |
|---------------------|-------|-------|-------|-------|-------|-------|-------|-------|
| pLW-97              | 0.06% | 0.33% | 0.16% | 0.00% | 0.00% | 0.00% | 0.00% | 0.00% |
| Enterobacteriales   | 0.05% | 0.05% | 0.19% | 0.03% | 0.01% | 0.03% | 0.00% | 0.00% |
| Solirubrobacterales | 0.02% | 0.01% | 0.03% | 0.08% | 0.04% | 0.03% | 0.00% | 0.03% |
| Bifidobacteriales   | 0.07% | 0.06% | 0.17% | 0.02% | 0.01% | 0.00% | 0.05% | 0.02% |
| Spirochaetales      | 0.00% | 0.00% | 0.00% | 0.16% | 0.10% | 0.00% | 0.00% | 0.00% |
| Leptospirales       | 0.03% | 0.04% | 0.01% | 0.06% | 0.11% | 0.00% | 0.01% | 0.02% |
| Erysipelotrichales  | 0.00% | 0.00% | 0.22% | 0.00% | 0.00% | 0.00% | 0.13% | 0.00% |
| PK29                | 0.03% | 0.12% | 0.11% | 0.00% | 0.03% | 0.00% | 0.00% | 0.00% |
| WCHB1-50            | 0.03% | 0.19% | 0.13% | 0.00% | 0.00% | 0.00% | 0.00% | 0.00% |
| Verrucomicrobiales  | 0.08% | 0.05% | 0.07% | 0.00% | 0.00% | 0.00% | 0.07% | 0.01% |
| KD8-87              | 0.00% | 0.02% | 0.00% | 0.00% | 0.10% | 0.00% | 0.05% | 0.01% |
| EW055               | 0.06% | 0.05% | 0.09% | 0.01% | 0.00% | 0.01% | 0.00% | 0.00% |
| envOPS12            | 0.13% | 0.05% | 0.06% | 0.00% | 0.00% | 0.00% | 0.00% | 0.00% |
| Coriobacteriales    | 0.12% | 0.02% | 0.06% | 0.00% | 0.01% | 0.00% | 0.01% | 0.00% |
| WCHB1-41            | 0.00% | 0.00% | 0.00% | 0.15% | 0.01% | 0.00% | 0.00% | 0.00% |
| NB1-j               | 0.00% | 0.03% | 0.00% | 0.01% | 0.04% | 0.01% | 0.01% | 0.04% |
| Fimbriimonadales    | 0.00% | 0.02% | 0.01% | 0.00% | 0.00% | 0.06% | 0.00% | 0.00% |
| Acidobacteriales    | 0.02% | 0.01% | 0.01% | 0.00% | 0.00% | 0.01% | 0.08% | 0.02% |
| Gallionellales      | 0.00% | 0.00% | 0.00% | 0.09% | 0.03% | 0.00% | 0.00% | 0.00% |
| Bacillales          | 0.01% | 0.00% | 0.00% | 0.01% | 0.03% | 0.03% | 0.01% | 0.00% |
| Chlamydiales        | 0.03% | 0.01% | 0.02% | 0.00% | 0.00% | 0.00% | 0.06% | 0.03% |
| I025                | 0.03% | 0.03% | 0.05% | 0.00% | 0.02% | 0.00% | 0.00% | 0.00% |
| Thermales           | 0.01% | 0.03% | 0.02% | 0.01% | 0.04% | 0.00% | 0.01% | 0.00% |
| Pedosphaerales      | 0.00% | 0.00% | 0.00% | 0.02% | 0.06% | 0.00% | 0.00% | 0.00% |
| LD1-PB3             | 0.00% | 0.00% | 0.00% | 0.02% | 0.07% | 0.00% | 0.00% | 0.00% |

|                    |       |       |       |       |       |       |       |       |
|--------------------|-------|-------|-------|-------|-------|-------|-------|-------|
| Chthoniobacterales | 0.00% | 0.00% | 0.00% | 0.00% | 0.09% | 0.00% | 0.00% | 0.00% |
| Thiobacterales     | 0.04% | 0.03% | 0.01% | 0.00% | 0.00% | 0.00% | 0.00% | 0.00% |
| Streptophyta       | 0.00% | 0.00% | 0.00% | 0.00% | 0.06% | 0.00% | 0.04% | 0.00% |
| agg27              | 0.00% | 0.01% | 0.02% | 0.00% | 0.00% | 0.00% | 0.06% | 0.01% |
| WCHB1-15           | 0.05% | 0.00% | 0.00% | 0.00% | 0.00% | 0.00% | 0.01% | 0.00% |
| Blgi18             | 0.06% | 0.00% | 0.01% | 0.00% | 0.00% | 0.00% | 0.00% | 0.00% |
| Aeromonadales      | 0.01% | 0.01% | 0.02% | 0.01% | 0.00% | 0.00% | 0.02% | 0.00% |
| HTCC2188           | 0.00% | 0.00% | 0.00% | 0.03% | 0.02% | 0.00% | 0.00% | 0.00% |
| YJF2-48            | 0.00% | 0.01% | 0.00% | 0.00% | 0.00% | 0.00% | 0.00% | 0.04% |
| Gaiellales         | 0.00% | 0.02% | 0.01% | 0.00% | 0.00% | 0.00% | 0.00% | 0.00% |
| 34P16              | 0.00% | 0.00% | 0.00% | 0.02% | 0.02% | 0.00% | 0.00% | 0.00% |
| Spirobacillales    | 0.00% | 0.00% | 0.00% | 0.00% | 0.01% | 0.02% | 0.00% | 0.00% |
| FAC87              | 0.00% | 0.01% | 0.01% | 0.00% | 0.02% | 0.00% | 0.00% | 0.00% |
| BA021              | 0.00% | 0.00% | 0.00% | 0.00% | 0.03% | 0.00% | 0.00% | 0.00% |
| GMD14H09           | 0.00% | 0.00% | 0.00% | 0.00% | 0.03% | 0.00% | 0.00% | 0.00% |
| CW040              | 0.00% | 0.00% | 0.01% | 0.00% | 0.00% | 0.00% | 0.04% | 0.00% |
| Ellin6513          | 0.00% | 0.00% | 0.00% | 0.01% | 0.00% | 0.00% | 0.02% | 0.01% |
| FAC88              | 0.00% | 0.00% | 0.00% | 0.00% | 0.00% | 0.00% | 0.00% | 0.01% |
| Sphaerobacterales  | 0.00% | 0.00% | 0.00% | 0.01% | 0.01% | 0.00% | 0.00% | 0.00% |
| S-BQ2-57           | 0.00% | 0.00% | 0.00% | 0.00% | 0.03% | 0.00% | 0.00% | 0.00% |
| CFB-26             | 0.00% | 0.01% | 0.01% | 0.01% | 0.01% | 0.00% | 0.00% | 0.00% |
| PK329              | 0.02% | 0.02% | 0.00% | 0.00% | 0.00% | 0.00% | 0.00% | 0.00% |
| Neisseriales       | 0.01% | 0.00% | 0.00% | 0.00% | 0.02% | 0.00% | 0.00% | 0.00% |
| Z20                | 0.00% | 0.00% | 0.00% | 0.00% | 0.03% | 0.00% | 0.00% | 0.00% |
| Chloroflexales     | 0.01% | 0.01% | 0.01% | 0.00% | 0.00% | 0.00% | 0.00% | 0.00% |

|                  |       |       |       |       |       |       |       |       |
|------------------|-------|-------|-------|-------|-------|-------|-------|-------|
| Stramenopiles    | 0.03% | 0.00% | 0.00% | 0.00% | 0.00% | 0.00% | 0.00% | 0.00% |
| YS2              | 0.01% | 0.00% | 0.00% | 0.00% | 0.00% | 0.00% | 0.02% | 0.00% |
| Holophagales     | 0.00% | 0.00% | 0.00% | 0.00% | 0.01% | 0.00% | 0.00% | 0.01% |
| Turicibacterales | 0.00% | 0.00% | 0.00% | 0.00% | 0.01% | 0.00% | 0.00% | 0.00% |
| S1198            | 0.00% | 0.00% | 0.00% | 0.01% | 0.00% | 0.00% | 0.00% | 0.00% |
| OPB95            | 0.00% | 0.00% | 0.01% | 0.00% | 0.01% | 0.00% | 0.00% | 0.00% |
| PL-11B10         | 0.00% | 0.00% | 0.00% | 0.01% | 0.01% | 0.00% | 0.00% | 0.00% |
| A-2AF            | 0.01% | 0.00% | 0.01% | 0.00% | 0.00% | 0.00% | 0.00% | 0.00% |
| Methylophilales  | 0.00% | 0.00% | 0.00% | 0.00% | 0.01% | 0.00% | 0.00% | 0.00% |
| Ellin5290        | 0.00% | 0.00% | 0.00% | 0.00% | 0.00% | 0.00% | 0.00% | 0.01% |
| Gemmatimonadales | 0.00% | 0.02% | 0.00% | 0.00% | 0.00% | 0.00% | 0.00% | 0.00% |
| MVP-88           | 0.01% | 0.00% | 0.00% | 0.00% | 0.00% | 0.00% | 0.00% | 0.00% |
| RF32             | 0.00% | 0.00% | 0.00% | 0.00% | 0.00% | 0.00% | 0.02% | 0.00% |
| MND1             | 0.00% | 0.01% | 0.00% | 0.00% | 0.00% | 0.00% | 0.00% | 0.00% |
| MIZ46            | 0.01% | 0.00% | 0.00% | 0.00% | 0.00% | 0.00% | 0.00% | 0.00% |
| Fusobacteriales  | 0.00% | 0.01% | 0.00% | 0.00% | 0.00% | 0.00% | 0.00% | 0.00% |
| SHA-1            | 0.00% | 0.00% | 0.00% | 0.00% | 0.00% | 0.00% | 0.00% | 0.00% |
| DS-18            | 0.00% | 0.00% | 0.00% | 0.00% | 0.00% | 0.00% | 0.00% | 0.01% |

**Table S8: Activated sludge bacterial community composition at the family level (%)**

| TaxonName      | QG(Ano) | QG(Ana) | QG(O)  | SX-1-(A) | SX-1-(O) | SX.2.OD | SY(A)  | SY(O)  |
|----------------|---------|---------|--------|----------|----------|---------|--------|--------|
| Nitrospiraceae | 4.92%   | 5.66%   | 5.44%  | 0.43%    | 1.99%    | 70.58%  | 2.85%  | 5.02%  |
| Ellin6075      | 5.98%   | 16.44%  | 10.77% | 1.05%    | 3.79%    | 1.45%   | 43.99% | 49.47% |
| Comamonadaceae | 10.03%  | 13.46%  | 7.71%  | 21.85%   | 23.18%   | 8.21%   | 4.92%  | 7.35%  |

|                         |        |        |        |        |        |       |        |        |
|-------------------------|--------|--------|--------|--------|--------|-------|--------|--------|
| Hydrogenophilaceae      | 0.12%  | 0.05%  | 0.01%  | 16.20% | 3.24%  | 0.46% | 2.39%  | 4.94%  |
| Caldilineaceae          | 18.78% | 11.01% | 22.10% | 0.16%  | 0.69%  | 0.74% | 0.01%  | 0.07%  |
| Rhodocyclaceae          | 4.42%  | 3.67%  | 1.61%  | 9.03%  | 4.11%  | 2.07% | 0.32%  | 0.81%  |
| Saprospiraceae          | 2.85%  | 8.80%  | 3.95%  | 0.30%  | 10.21% | 1.12% | 0.41%  | 0.56%  |
| Trueperaceae            | 0.04%  | 0.20%  | 0.03%  | 0.04%  | 0.05%  | 0.28% | 9.76%  | 12.92% |
| Hyphomicrobiaceae       | 3.93%  | 1.66%  | 1.94%  | 1.18%  | 3.35%  | 3.76% | 1.15%  | 1.92%  |
| Xanthomonadaceae        | 0.74%  | 1.96%  | 0.96%  | 8.45%  | 9.65%  | 0.12% | 0.11%  | 0.13%  |
| Sinobacteraceae         | 1.64%  | 1.92%  | 0.96%  | 6.37%  | 4.06%  | 0.68% | 0.61%  | 0.90%  |
| mb2424                  | 2.05%  | 4.79%  | 3.75%  | 0.11%  | 0.91%  | 0.84% | 1.22%  | 0.75%  |
| KSB4                    | 0.05%  | 0.05%  | 0.01%  | 7.68%  | 2.70%  | 0.02% | 0.02%  | 0.03%  |
| Rhodobacteraceae        | 3.63%  | 2.86%  | 2.68%  | 1.29%  | 3.25%  | 0.34% | 0.18%  | 0.25%  |
| Rhodospirillaceae       | 4.62%  | 1.52%  | 2.50%  | 0.63%  | 0.93%  | 0.73% | 0.30%  | 0.64%  |
| A4b                     | 1.53%  | 1.44%  | 1.50%  | 0.01%  | 0.07%  | 0.74% | 1.65%  | 1.91%  |
| Sphingomonadaceae       | 2.95%  | 1.14%  | 1.38%  | 1.01%  | 2.24%  | 0.46% | 0.70%  | 1.17%  |
| RB40                    | 0.12%  | 0.45%  | 0.22%  | 0.10%  | 2.77%  | 0.57% | 1.09%  | 1.13%  |
| Hyphomonadaceae         | 0.79%  | 1.29%  | 0.49%  | 0.15%  | 1.05%  | 0.80% | 1.13%  | 1.32%  |
| Acetobacteraceae        | 0.73%  | 0.35%  | 0.45%  | 1.57%  | 2.29%  | 0.36% | 1.08%  | 1.21%  |
| Ruminococcaceae         | 0.24%  | 0.22%  | 2.16%  | 0.12%  | 0.14%  | 0.16% | 10.27% | 0.02%  |
| C111                    | 3.86%  | 1.84%  | 1.82%  | 0.44%  | 1.32%  | 0.34% | 0.01%  | 0.09%  |
| Dethiosulfovibrionaceae | 0.23%  | 0.18%  | 0.41%  | 4.60%  | 0.79%  | 0.02% | 0.02%  | 0.01%  |
| Synergistaceae          | 0.47%  | 0.32%  | 1.16%  | 3.23%  | 0.84%  | 0.02% | 0.02%  | 0.01%  |
| Microbacteriaceae       | 0.55%  | 0.20%  | 0.22%  | 0.16%  | 0.26%  | 0.26% | 1.56%  | 2.19%  |
| Bradyrhizobiaceae       | 1.42%  | 0.72%  | 0.52%  | 0.86%  | 0.99%  | 0.09% | 0.68%  | 0.82%  |
| Methylocystaceae        | 2.62%  | 1.82%  | 1.89%  | 0.36%  | 0.59%  | 0.13% | 0.01%  | 0.09%  |
| S24-7                   | 0.07%  | 0.03%  | 2.72%  | 0.00%  | 0.23%  | 0.00% | 4.44%  | 0.01%  |

|                      |       |       |       |       |       |       |       |       |
|----------------------|-------|-------|-------|-------|-------|-------|-------|-------|
| Chitinophagaceae     | 1.11% | 1.77% | 1.66% | 0.01% | 0.53% | 0.45% | 0.08% | 0.14% |
| Nitrosomonadaceae    | 0.04% | 0.05% | 0.02% | 0.46% | 1.94% | 0.33% | 0.10% | 0.19% |
| Cryomorphaceae       | 0.47% | 1.54% | 0.65% | 0.09% | 0.44% | 0.18% | 0.21% | 0.32% |
| Ignavibacteriaceae   | 0.34% | 0.27% | 0.14% | 0.49% | 0.67% | 0.27% | 0.18% | 0.17% |
| Anaerolinaceae       | 2.77% | 0.32% | 0.54% | 0.00% | 0.02% | 0.00% | 0.00% | 0.00% |
| Intrasporangiaceae   | 1.35% | 1.19% | 1.24% | 0.01% | 0.02% | 0.00% | 0.00% | 0.00% |
| Veillonellaceae      | 0.62% | 0.57% | 1.33% | 0.11% | 0.30% | 0.06% | 0.19% | 0.03% |
| Caulobacteraceae     | 0.47% | 0.13% | 0.13% | 0.20% | 0.51% | 0.07% | 0.29% | 0.45% |
| Lachnospiraceae      | 0.12% | 0.08% | 0.50% | 0.05% | 0.14% | 0.18% | 1.50% | 0.09% |
| 125ds10              | 0.70% | 1.19% | 0.60% | 0.05% | 0.02% | 0.01% | 0.07% | 0.19% |
| Syntrophobacteraceae | 0.15% | 0.17% | 0.13% | 0.08% | 0.07% | 0.22% | 0.36% | 0.46% |
| Streptococcaceae     | 0.52% | 0.10% | 0.51% | 0.29% | 0.32% | 0.03% | 0.32% | 0.06% |
| Desulfobulbaceae     | 0.09% | 0.08% | 0.29% | 0.95% | 0.34% | 0.00% | 0.00% | 0.01% |
| Clostridiaceae       | 0.26% | 0.20% | 0.76% | 0.43% | 0.15% | 0.02% | 0.11% | 0.02% |
| EB1017               | 1.02% | 1.07% | 0.62% | 0.00% | 0.00% | 0.01% | 0.00% | 0.00% |
| CV106                | 0.00% | 0.00% | 0.00% | 0.00% | 0.00% | 0.00% | 0.00% | 0.00% |
| Geobacteraceae       | 0.00% | 0.00% | 0.00% | 0.70% | 0.67% | 0.00% | 0.00% | 0.00% |
| Solibacteraceae      | 0.00% | 0.03% | 0.00% | 0.34% | 0.48% | 0.04% | 0.08% | 0.21% |
| Bacteroidaceae       | 0.08% | 0.05% | 0.30% | 0.02% | 0.05% | 0.36% | 0.29% | 0.05% |
| Mogibacteriaceae     | 0.58% | 0.08% | 0.36% | 0.43% | 0.14% | 0.02% | 0.00% | 0.01% |
| Phyllobacteriaceae   | 0.23% | 0.18% | 0.15% | 0.11% | 0.31% | 0.08% | 0.07% | 0.17% |
| S47                  | 0.08% | 0.74% | 1.27% | 0.00% | 0.00% | 0.00% | 0.00% | 0.00% |
| Erythrobacteraceae   | 0.18% | 0.02% | 0.01% | 0.14% | 0.41% | 0.07% | 0.10% | 0.19% |
| Tissierellaceae      | 0.06% | 0.05% | 0.07% | 0.73% | 0.20% | 0.00% | 0.00% | 0.03% |
| Chromatiaceae        | 0.91% | 0.47% | 0.25% | 0.06% | 0.08% | 0.02% | 0.00% | 0.00% |

|                       |       |       |       |       |       |       |       |       |
|-----------------------|-------|-------|-------|-------|-------|-------|-------|-------|
| Rhizobiaceae          | 0.14% | 0.05% | 0.14% | 0.09% | 0.47% | 0.05% | 0.04% | 0.09% |
| Coxiellaceae          | 0.19% | 0.03% | 0.04% | 0.02% | 0.13% | 0.32% | 0.02% | 0.06% |
| SHA-31                | 1.05% | 0.10% | 0.14% | 0.01% | 0.08% | 0.02% | 0.10% | 0.05% |
| Pseudomonadaceae      | 0.35% | 0.03% | 0.05% | 0.41% | 0.16% | 0.03% | 0.05% | 0.05% |
| Dolo_23               | 0.11% | 0.03% | 0.12% | 0.01% | 0.27% | 0.20% | 0.06% | 0.07% |
| Prevotellaceae        | 0.03% | 0.10% | 0.30% | 0.22% | 0.32% | 0.03% | 0.17% | 0.00% |
| Microthrixaceae       | 0.72% | 0.54% | 0.29% | 0.02% | 0.06% | 0.00% | 0.00% | 0.01% |
| SB-1                  | 0.05% | 0.03% | 0.00% | 0.63% | 0.21% | 0.00% | 0.00% | 0.02% |
| Haliangiaceae         | 0.33% | 0.40% | 0.17% | 0.01% | 0.12% | 0.02% | 0.00% | 0.00% |
| Rikenellaceae         | 0.00% | 0.02% | 0.14% | 0.11% | 0.02% | 0.00% | 1.08% | 0.00% |
| Xanthobacteraceae     | 0.08% | 0.00% | 0.04% | 0.31% | 0.32% | 0.03% | 0.00% | 0.01% |
| Lactobacillaceae      | 0.03% | 0.00% | 0.68% | 0.01% | 0.14% | 0.00% | 0.39% | 0.01% |
| Bdellovibrionaceae    | 0.12% | 0.10% | 0.04% | 0.03% | 0.35% | 0.02% | 0.05% | 0.10% |
| Desulfomicrobiaceae   | 0.01% | 0.02% | 0.00% | 0.68% | 0.07% | 0.00% | 0.00% | 0.01% |
| Mycobacteriaceae      | 0.16% | 0.10% | 0.02% | 0.04% | 0.04% | 0.01% | 0.27% | 0.23% |
| Beijerinckiaceae      | 0.29% | 0.05% | 0.06% | 0.01% | 0.04% | 0.23% | 0.00% | 0.00% |
| Cytophagaceae         | 0.04% | 0.20% | 0.03% | 0.02% | 0.14% | 0.14% | 0.01% | 0.01% |
| Helicobacteraceae     | 0.00% | 0.00% | 0.07% | 0.34% | 0.07% | 0.00% | 0.45% | 0.00% |
| Burkholderiaceae      | 0.17% | 0.32% | 0.18% | 0.01% | 0.02% | 0.15% | 0.00% | 0.00% |
| Halomonadaceae        | 0.09% | 0.03% | 0.01% | 0.06% | 0.42% | 0.02% | 0.06% | 0.09% |
| Legionellaceae        | 0.23% | 0.03% | 0.02% | 0.01% | 0.04% | 0.11% | 0.06% | 0.09% |
| Peptostreptococcaceae | 0.11% | 0.03% | 0.78% | 0.04% | 0.02% | 0.01% | 0.01% | 0.01% |
| Nocardiodaceae        | 0.48% | 0.17% | 0.28% | 0.01% | 0.04% | 0.01% | 0.02% | 0.01% |
| PRR-10                | 0.19% | 0.64% | 0.15% | 0.00% | 0.00% | 0.00% | 0.00% | 0.00% |
| Moraxellaceae         | 0.07% | 0.02% | 0.31% | 0.14% | 0.19% | 0.01% | 0.00% | 0.01% |



|                      |       |       |       |       |       |       |       |       |
|----------------------|-------|-------|-------|-------|-------|-------|-------|-------|
| Marinilabiaceae      | 0.02% | 0.00% | 0.00% | 0.47% | 0.11% | 0.00% | 0.00% | 0.00% |
| Isosphaeraceae       | 0.17% | 0.17% | 0.51% | 0.04% | 0.04% | 0.00% | 0.00% | 0.00% |
| Porphyromonadaceae   | 0.08% | 0.02% | 0.41% | 0.11% | 0.05% | 0.02% | 0.08% | 0.00% |
| Desulfobacteraceae   | 0.00% | 0.00% | 0.00% | 0.33% | 0.21% | 0.00% | 0.00% | 0.00% |
| Methylococcaceae     | 0.12% | 0.10% | 0.12% | 0.00% | 0.00% | 0.16% | 0.00% | 0.00% |
| GZKB119              | 0.00% | 0.00% | 0.00% | 0.37% | 0.16% | 0.00% | 0.00% | 0.00% |
| Propionibacteriaceae | 0.34% | 0.03% | 0.15% | 0.01% | 0.15% | 0.00% | 0.01% | 0.01% |
| Piscirickettsiaceae  | 0.07% | 0.10% | 0.03% | 0.01% | 0.11% | 0.01% | 0.07% | 0.01% |
| Weeksellaceae        | 0.02% | 0.00% | 0.45% | 0.01% | 0.05% | 0.00% | 0.01% | 0.01% |
| TTA_B6               | 0.16% | 0.07% | 0.14% | 0.19% | 0.05% | 0.00% | 0.00% | 0.01% |
| Alteromonadaceae     | 0.03% | 0.00% | 0.01% | 0.08% | 0.25% | 0.02% | 0.02% | 0.00% |
| Desulfovibrionaceae  | 0.00% | 0.03% | 0.17% | 0.07% | 0.05% | 0.00% | 0.29% | 0.01% |
| Alcaligenaceae       | 0.00% | 0.05% | 0.05% | 0.01% | 0.13% | 0.08% | 0.02% | 0.01% |
| Enterobacteriaceae   | 0.08% | 0.08% | 0.29% | 0.04% | 0.01% | 0.04% | 0.00% | 0.00% |
| Bifidobacteriaceae   | 0.12% | 0.10% | 0.25% | 0.03% | 0.02% | 0.00% | 0.06% | 0.02% |
| PAUC26f              | 0.00% | 0.00% | 0.00% | 0.01% | 0.00% | 0.04% | 0.08% | 0.11% |
| Aminiphilaceae       | 0.01% | 0.00% | 0.00% | 0.29% | 0.04% | 0.00% | 0.00% | 0.00% |
| Spirochaetaceae      | 0.00% | 0.00% | 0.00% | 0.20% | 0.14% | 0.00% | 0.00% | 0.00% |
| Thermovirgaceae      | 0.00% | 0.00% | 0.00% | 0.26% | 0.00% | 0.01% | 0.00% | 0.00% |
| Carnobacteriaceae    | 0.17% | 0.03% | 0.20% | 0.04% | 0.01% | 0.00% | 0.00% | 0.00% |
| Erysipelotrichaceae  | 0.00% | 0.00% | 0.33% | 0.00% | 0.00% | 0.00% | 0.17% | 0.00% |
| Gemmataceae          | 0.03% | 0.07% | 0.12% | 0.05% | 0.12% | 0.00% | 0.00% | 0.00% |
| Oxalobacteraceae     | 0.00% | 0.28% | 0.13% | 0.02% | 0.02% | 0.02% | 0.00% | 0.00% |
| Verrucomicrobiaceae  | 0.14% | 0.08% | 0.11% | 0.00% | 0.00% | 0.00% | 0.08% | 0.01% |
| Crenotrichaceae      | 0.11% | 0.07% | 0.24% | 0.00% | 0.00% | 0.00% | 0.00% | 0.00% |

|                        |       |       |       |       |       |       |       |       |
|------------------------|-------|-------|-------|-------|-------|-------|-------|-------|
| Peptococcaceae         | 0.07% | 0.05% | 0.11% | 0.06% | 0.02% | 0.00% | 0.05% | 0.00% |
| Dietziaceae            | 0.25% | 0.03% | 0.05% | 0.00% | 0.02% | 0.00% | 0.00% | 0.00% |
| Coriobacteriaceae      | 0.20% | 0.03% | 0.10% | 0.00% | 0.02% | 0.00% | 0.01% | 0.00% |
| Methylobacteriaceae    | 0.02% | 0.00% | 0.00% | 0.10% | 0.02% | 0.03% | 0.04% | 0.00% |
| RFP12                  | 0.00% | 0.00% | 0.00% | 0.19% | 0.02% | 0.00% | 0.00% | 0.00% |
| Nakamurellaceae        | 0.00% | 0.00% | 0.00% | 0.00% | 0.00% | 0.00% | 0.13% | 0.10% |
| Flavobacteriaceae      | 0.07% | 0.00% | 0.02% | 0.01% | 0.05% | 0.01% | 0.02% | 0.03% |
| JTB38                  | 0.00% | 0.05% | 0.00% | 0.01% | 0.06% | 0.02% | 0.01% | 0.02% |
| AKIW874                | 0.00% | 0.00% | 0.00% | 0.00% | 0.00% | 0.10% | 0.00% | 0.00% |
| Christensenellaceae    | 0.14% | 0.03% | 0.06% | 0.02% | 0.01% | 0.01% | 0.00% | 0.00% |
| Kouleothrixaceae       | 0.00% | 0.33% | 0.07% | 0.00% | 0.00% | 0.00% | 0.00% | 0.00% |
| Roseiflexaceae         | 0.00% | 0.00% | 0.01% | 0.00% | 0.00% | 0.04% | 0.00% | 0.00% |
| Ectothiorhodospiraceae | 0.09% | 0.08% | 0.02% | 0.00% | 0.00% | 0.03% | 0.00% | 0.00% |
| Gallionellaceae        | 0.00% | 0.00% | 0.00% | 0.12% | 0.05% | 0.00% | 0.00% | 0.00% |
| Leptospiraceae         | 0.04% | 0.07% | 0.01% | 0.01% | 0.09% | 0.00% | 0.00% | 0.01% |
| Paraprevotellaceae     | 0.02% | 0.00% | 0.01% | 0.00% | 0.00% | 0.00% | 0.27% | 0.00% |
| BA008                  | 0.01% | 0.00% | 0.00% | 0.10% | 0.06% | 0.00% | 0.00% | 0.00% |
| Sediment-4             | 0.00% | 0.00% | 0.00% | 0.07% | 0.07% | 0.00% | 0.01% | 0.02% |
| Koribacteraceae        | 0.03% | 0.02% | 0.02% | 0.00% | 0.00% | 0.01% | 0.10% | 0.01% |
| Corynebacteriaceae     | 0.01% | 0.03% | 0.00% | 0.00% | 0.06% | 0.02% | 0.05% | 0.01% |
| oc28                   | 0.04% | 0.07% | 0.12% | 0.00% | 0.00% | 0.00% | 0.04% | 0.00% |
| Thiotrichaceae         | 0.01% | 0.03% | 0.20% | 0.00% | 0.00% | 0.00% | 0.00% | 0.00% |
| Myxococcaceae          | 0.20% | 0.03% | 0.00% | 0.00% | 0.00% | 0.00% | 0.00% | 0.00% |
| Nocardiaceae           | 0.00% | 0.00% | 0.00% | 0.03% | 0.04% | 0.00% | 0.00% | 0.02% |
| Dehalobacteriaceae     | 0.01% | 0.00% | 0.02% | 0.00% | 0.00% | 0.00% | 0.21% | 0.00% |

|                     |       |       |       |       |       |       |       |       |
|---------------------|-------|-------|-------|-------|-------|-------|-------|-------|
| Thermaceae          | 0.02% | 0.05% | 0.03% | 0.01% | 0.05% | 0.00% | 0.01% | 0.00% |
| Odoribacteraceae    | 0.00% | 0.00% | 0.05% | 0.00% | 0.00% | 0.00% | 0.16% | 0.00% |
| Chthoniobacteraceae | 0.00% | 0.00% | 0.00% | 0.00% | 0.13% | 0.00% | 0.00% | 0.00% |
| auto67_4W           | 0.00% | 0.00% | 0.00% | 0.03% | 0.09% | 0.00% | 0.00% | 0.00% |
| Campylobacteraceae  | 0.00% | 0.00% | 0.03% | 0.02% | 0.06% | 0.01% | 0.00% | 0.00% |
| Iamiaceae           | 0.00% | 0.00% | 0.00% | 0.02% | 0.00% | 0.00% | 0.02% | 0.03% |
| Fimbriimonadaceae   | 0.00% | 0.03% | 0.02% | 0.00% | 0.00% | 0.03% | 0.00% | 0.00% |
| Actinomycetaceae    | 0.00% | 0.03% | 0.05% | 0.02% | 0.01% | 0.00% | 0.00% | 0.01% |
| ntu14               | 0.00% | 0.00% | 0.00% | 0.02% | 0.02% | 0.00% | 0.01% | 0.03% |
| Shewanellaceae      | 0.02% | 0.00% | 0.01% | 0.00% | 0.05% | 0.00% | 0.00% | 0.00% |
| Bacillaceae         | 0.00% | 0.00% | 0.00% | 0.00% | 0.02% | 0.03% | 0.01% | 0.00% |
| Nannocystaceae      | 0.02% | 0.05% | 0.05% | 0.00% | 0.00% | 0.00% | 0.00% | 0.00% |
| Syntrophaceae       | 0.03% | 0.00% | 0.01% | 0.03% | 0.02% | 0.00% | 0.00% | 0.00% |
| Parachlamydiaceae   | 0.02% | 0.00% | 0.00% | 0.00% | 0.00% | 0.00% | 0.05% | 0.03% |
| Syntrophorhabdaceae | 0.11% | 0.00% | 0.00% | 0.00% | 0.00% | 0.00% | 0.00% | 0.00% |
| Aeromonadaceae      | 0.01% | 0.02% | 0.03% | 0.02% | 0.00% | 0.00% | 0.00% | 0.00% |
| Pseudonocardiaceae  | 0.00% | 0.00% | 0.00% | 0.03% | 0.00% | 0.00% | 0.00% | 0.01% |
| Phycisphaeraceae    | 0.00% | 0.00% | 0.00% | 0.00% | 0.00% | 0.00% | 0.05% | 0.01% |
| Listeriaceae        | 0.01% | 0.00% | 0.00% | 0.01% | 0.02% | 0.00% | 0.00% | 0.00% |
| F16                 | 0.00% | 0.00% | 0.02% | 0.00% | 0.00% | 0.00% | 0.05% | 0.00% |
| Pelobacteraceae     | 0.00% | 0.00% | 0.00% | 0.04% | 0.00% | 0.00% | 0.00% | 0.00% |
| SJA-101             | 0.03% | 0.00% | 0.03% | 0.00% | 0.00% | 0.00% | 0.00% | 0.00% |
| Bryobacteraceae     | 0.04% | 0.02% | 0.00% | 0.00% | 0.00% | 0.00% | 0.00% | 0.00% |
| Streptomycetaceae   | 0.01% | 0.00% | 0.02% | 0.00% | 0.00% | 0.01% | 0.00% | 0.00% |
| Neisseriaceae       | 0.02% | 0.00% | 0.00% | 0.00% | 0.02% | 0.00% | 0.00% | 0.00% |



|                       |       |       |       |       |       |       |       |       |
|-----------------------|-------|-------|-------|-------|-------|-------|-------|-------|
| Promicromonosporaceae | 0.00% | 0.00% | 0.00% | 0.01% | 0.00% | 0.00% | 0.00% | 0.00% |
| Eubacteriaceae        | 0.01% | 0.00% | 0.01% | 0.00% | 0.00% | 0.00% | 0.00% | 0.00% |
| 0319-6G20             | 0.01% | 0.00% | 0.00% | 0.00% | 0.00% | 0.00% | 0.00% | 0.00% |
| Solirubrobacteraceae  | 0.00% | 0.00% | 0.00% | 0.00% | 0.00% | 0.00% | 0.00% | 0.00% |
| Oscillochloridaceae   | 0.01% | 0.02% | 0.00% | 0.00% | 0.00% | 0.00% | 0.00% | 0.00% |
| Chloroflexaceae       | 0.00% | 0.00% | 0.02% | 0.00% | 0.00% | 0.00% | 0.00% | 0.00% |
| Fusobacteriaceae      | 0.00% | 0.02% | 0.00% | 0.00% | 0.00% | 0.00% | 0.00% | 0.00% |
| Patulibacteraceae     | 0.00% | 0.00% | 0.02% | 0.00% | 0.00% | 0.00% | 0.00% | 0.00% |

**Table S9: Activated sludge bacterial community composition at the genus level (%)**

| TaxonName      | QG(Ano) | QG(Ana) | QG(O)  | SX-1-(A) | SX-1-(O) | SX.2.OD | SY(A)  | SY(O)  |
|----------------|---------|---------|--------|----------|----------|---------|--------|--------|
| Nitrospira     | 20.92%  | 33.68%  | 23.09% | 1.72%    | 9.93%    | 94.68%  | 10.58% | 17.68% |
| Thiobacillus   | 0.25%   | 0.15%   | 0.02%  | 40.44%   | 11.72%   | 0.31%   | 8.79%  | 17.26% |
| Caldilinea     | 32.19%  | 26.16%  | 39.15% | 0.05%    | 0.05%    | 0.37%   | 0.00%  | 0.00%  |
| B-42           | 0.09%   | 0.60%   | 0.07%  | 0.09%    | 0.19%    | 0.19%   | 35.94% | 45.12% |
| Hyphomicrobium | 5.11%   | 3.04%   | 2.56%  | 1.36%    | 7.97%    | 1.70%   | 3.39%  | 4.22%  |
| Thauera        | 0.90%   | 1.40%   | 0.27%  | 7.48%    | 9.55%    | 0.15%   | 0.36%  | 1.27%  |
| HA73           | 0.09%   | 0.10%   | 0.04%  | 11.42%   | 2.83%    | 0.01%   | 0.09%  | 0.02%  |
| vadinCA02      | 1.01%   | 0.95%   | 2.47%  | 8.07%    | 3.02%    | 0.01%   | 0.09%  | 0.05%  |
| Dokdonella     | 0.36%   | 3.54%   | 0.94%  | 1.11%    | 8.87%    | 0.01%   | 0.09%  | 0.31%  |
| Alicyclophilus | 0.09%   | 0.20%   | 0.09%  | 1.72%    | 3.29%    | 0.07%   | 1.43%  | 2.40%  |
| Dechloromonas  | 6.59%   | 3.29%   | 1.15%  | 0.92%    | 0.27%    | 0.10%   | 0.04%  | 0.07%  |
| Comamonas      | 1.90%   | 0.55%   | 0.49%  | 1.25%    | 1.36%    | 0.14%   | 1.16%  | 1.37%  |
| Rhodobacter    | 2.55%   | 4.33%   | 2.68%  | 0.49%    | 1.88%    | 0.00%   | 0.00%  | 0.02%  |
| Oscillospira   | 0.02%   | 0.00%   | 0.88%  | 0.03%    | 0.05%    | 0.00%   | 14.06% | 0.02%  |

|                        |       |       |       |       |       |       |       |       |
|------------------------|-------|-------|-------|-------|-------|-------|-------|-------|
| Rhodoplanes            | 0.54% | 0.15% | 0.13% | 0.68% | 1.39% | 0.30% | 0.09% | 0.35% |
| Paracoccus             | 3.81% | 0.90% | 1.01% | 0.40% | 1.58% | 0.02% | 0.04% | 0.09% |
| Novosphingobium        | 2.33% | 0.45% | 0.43% | 0.13% | 1.47% | 0.09% | 0.22% | 0.26% |
| Hydrogenophaga         | 0.36% | 0.80% | 0.29% | 1.22% | 1.36% | 0.05% | 0.09% | 0.35% |
| Geobacter              | 0.00% | 0.00% | 0.00% | 1.74% | 2.42% | 0.00% | 0.00% | 0.00% |
| Bacteroides            | 0.18% | 0.15% | 0.63% | 0.05% | 0.16% | 0.24% | 1.07% | 0.19% |
| Sphingobium            | 0.02% | 0.20% | 0.02% | 0.33% | 1.25% | 0.05% | 0.63% | 0.83% |
| Ruminococcus           | 0.13% | 0.10% | 1.08% | 0.05% | 0.08% | 0.01% | 4.73% | 0.00% |
| Prevotella             | 0.11% | 0.30% | 0.65% | 0.55% | 1.14% | 0.02% | 1.29% | 0.00% |
| Pseudomonas            | 0.74% | 0.10% | 0.11% | 1.01% | 0.49% | 0.02% | 0.18% | 0.19% |
| Steroidobacter         | 0.00% | 0.00% | 0.00% | 0.49% | 1.60% | 0.07% | 0.13% | 0.21% |
| Tissierella_Soehngenia | 0.02% | 0.00% | 0.02% | 1.77% | 0.63% | 0.00% | 0.00% | 0.07% |
| Hyphomonas             | 0.07% | 0.00% | 0.00% | 0.25% | 2.37% | 0.02% | 0.22% | 0.26% |
| Streptococcus          | 0.38% | 0.30% | 0.81% | 0.51% | 0.68% | 0.02% | 0.09% | 0.00% |
| Desulfobulbus          | 0.18% | 0.20% | 0.61% | 1.03% | 0.54% | 0.00% | 0.00% | 0.02% |
| Limnohabitans          | 0.25% | 1.15% | 0.36% | 0.41% | 0.76% | 0.02% | 0.00% | 0.02% |
| Phenylobacterium       | 0.09% | 0.10% | 0.00% | 0.41% | 1.22% | 0.00% | 0.58% | 0.64% |
| Lactobacillus          | 0.07% | 0.00% | 1.44% | 0.03% | 0.52% | 0.00% | 1.43% | 0.05% |
| Desulfomicrobium       | 0.02% | 0.05% | 0.00% | 1.71% | 0.24% | 0.00% | 0.00% | 0.02% |
| T78                    | 2.26% | 0.25% | 0.22% | 0.00% | 0.08% | 0.00% | 0.00% | 0.00% |
| Bdellovibrio           | 0.25% | 0.30% | 0.09% | 0.08% | 1.25% | 0.01% | 0.18% | 0.33% |
| Sphingomonas           | 0.27% | 0.10% | 0.04% | 0.02% | 0.54% | 0.00% | 0.85% | 1.32% |
| Anaerovorax            | 0.25% | 0.05% | 0.31% | 1.06% | 0.49% | 0.01% | 0.00% | 0.02% |
| Mycobacterium          | 0.34% | 0.30% | 0.04% | 0.11% | 0.14% | 0.00% | 0.98% | 0.80% |
| Xanthobacter           | 0.18% | 0.00% | 0.07% | 0.76% | 1.01% | 0.02% | 0.00% | 0.00% |
| Lactococcus            | 0.72% | 0.00% | 0.27% | 0.22% | 0.46% | 0.00% | 1.07% | 0.21% |
| Devosia                | 0.78% | 0.50% | 0.56% | 0.05% | 0.11% | 0.05% | 0.00% | 0.09% |
| Mesorhizobium          | 0.20% | 0.35% | 0.20% | 0.11% | 0.38% | 0.03% | 0.18% | 0.45% |

|                       |       |       |       |       |       |       |       |       |
|-----------------------|-------|-------|-------|-------|-------|-------|-------|-------|
| Candidatus            | 0.18% | 0.25% | 0.02% | 0.22% | 0.57% | 0.01% | 0.22% | 0.42% |
| Pedomicrobium         | 0.36% | 0.15% | 0.13% | 0.00% | 0.00% | 0.14% | 0.00% | 0.00% |
| Leucobacter           | 0.45% | 0.35% | 0.20% | 0.30% | 0.60% | 0.00% | 0.18% | 0.26% |
| Aquicella             | 0.00% | 0.00% | 0.02% | 0.03% | 0.22% | 0.18% | 0.00% | 0.00% |
| Faecalibacterium      | 0.16% | 0.20% | 0.38% | 0.16% | 0.11% | 0.09% | 0.00% | 0.05% |
| Methylibium           | 0.34% | 0.75% | 0.20% | 0.05% | 0.05% | 0.06% | 0.13% | 0.09% |
| Allochromatium        | 1.21% | 0.45% | 0.18% | 0.02% | 0.08% | 0.01% | 0.00% | 0.00% |
| Dok59                 | 0.02% | 1.84% | 0.74% | 0.06% | 0.03% | 0.00% | 0.00% | 0.00% |
| Thermomonas           | 0.34% | 0.55% | 0.47% | 0.09% | 0.11% | 0.03% | 0.00% | 0.12% |
| Propionicimonas       | 0.92% | 0.50% | 0.52% | 0.03% | 0.00% | 0.00% | 0.00% | 0.00% |
| Clostridium           | 0.20% | 0.35% | 0.56% | 0.28% | 0.33% | 0.00% | 0.00% | 0.00% |
| Desulfococcus         | 0.00% | 0.00% | 0.00% | 0.79% | 0.65% | 0.00% | 0.00% | 0.00% |
| Veillonella           | 0.18% | 0.10% | 0.43% | 0.03% | 0.79% | 0.01% | 0.22% | 0.02% |
| Halomonas             | 0.16% | 0.05% | 0.00% | 0.05% | 1.39% | 0.01% | 0.13% | 0.07% |
| Parvibaculum          | 0.02% | 0.00% | 0.00% | 0.43% | 0.98% | 0.00% | 0.04% | 0.02% |
| E6                    | 0.34% | 0.20% | 0.29% | 0.47% | 0.16% | 0.00% | 0.00% | 0.02% |
| PD-UASB-13            | 0.40% | 0.45% | 0.79% | 0.06% | 0.03% | 0.00% | 0.00% | 0.00% |
| Longilinea            | 1.10% | 0.30% | 0.29% | 0.00% | 0.00% | 0.00% | 0.00% | 0.00% |
| HB2-32-21             | 0.07% | 0.00% | 0.00% | 0.21% | 0.87% | 0.01% | 0.09% | 0.00% |
| Blastomonas           | 0.34% | 0.05% | 0.02% | 0.02% | 0.41% | 0.03% | 0.00% | 0.17% |
| Methylocaldum         | 0.09% | 0.00% | 0.07% | 0.00% | 0.00% | 0.10% | 0.00% | 0.00% |
| Salinibacterium       | 0.49% | 0.15% | 0.09% | 0.08% | 0.11% | 0.01% | 0.22% | 0.17% |
| Bifidobacterium       | 0.25% | 0.30% | 0.54% | 0.06% | 0.05% | 0.00% | 0.22% | 0.07% |
| Cloacibacterium       | 0.04% | 0.00% | 0.97% | 0.00% | 0.03% | 0.00% | 0.04% | 0.02% |
| Phascolarctobacterium | 0.22% | 0.10% | 0.31% | 0.05% | 0.05% | 0.03% | 0.13% | 0.02% |
| Methylosinus          | 0.13% | 0.40% | 0.13% | 0.03% | 0.19% | 0.01% | 0.04% | 0.24% |
| Methyloversatilis     | 0.00% | 0.00% | 0.00% | 0.22% | 0.14% | 0.01% | 0.00% | 0.09% |
| Kaistobacter          | 0.00% | 0.00% | 0.00% | 0.16% | 0.49% | 0.00% | 0.31% | 0.24% |

|                   |       |       |       |       |       |       |       |       |
|-------------------|-------|-------|-------|-------|-------|-------|-------|-------|
| Proteiniclasticum | 0.16% | 0.10% | 0.63% | 0.06% | 0.00% | 0.00% | 0.09% | 0.05% |
| Sulfuricurvum     | 0.00% | 0.00% | 0.00% | 0.70% | 0.05% | 0.00% | 0.00% | 0.00% |
| Allobaculum       | 0.00% | 0.00% | 0.70% | 0.00% | 0.00% | 0.00% | 0.63% | 0.00% |
| Paludibacter      | 0.11% | 0.05% | 0.63% | 0.11% | 0.03% | 0.00% | 0.00% | 0.00% |
| Aminiphilus       | 0.02% | 0.00% | 0.00% | 0.60% | 0.08% | 0.00% | 0.00% | 0.00% |
| Crenothrix        | 0.22% | 0.20% | 0.52% | 0.00% | 0.00% | 0.00% | 0.00% | 0.00% |
| Dietzia           | 0.54% | 0.10% | 0.11% | 0.00% | 0.08% | 0.00% | 0.00% | 0.00% |
| Anaerolinea       | 0.69% | 0.00% | 0.04% | 0.00% | 0.00% | 0.00% | 0.00% | 0.00% |
| Acidovorax        | 0.07% | 0.60% | 0.25% | 0.00% | 0.00% | 0.00% | 0.00% | 0.14% |
| Helicobacter      | 0.00% | 0.00% | 0.11% | 0.00% | 0.00% | 0.00% | 1.21% | 0.00% |
| Burkholderia      | 0.00% | 0.00% | 0.00% | 0.00% | 0.03% | 0.07% | 0.00% | 0.00% |
| Rubrivivax        | 0.31% | 0.50% | 0.16% | 0.00% | 0.00% | 0.00% | 0.00% | 0.00% |
| Zoogloea          | 0.16% | 0.50% | 0.29% | 0.00% | 0.00% | 0.00% | 0.00% | 0.00% |
| Acinetobacter     | 0.07% | 0.05% | 0.31% | 0.03% | 0.16% | 0.00% | 0.00% | 0.02% |
| Treponema         | 0.00% | 0.00% | 0.00% | 0.32% | 0.24% | 0.00% | 0.00% | 0.00% |
| Perlucidibaca     | 0.00% | 0.00% | 0.00% | 0.22% | 0.30% | 0.00% | 0.00% | 0.00% |
| Megasphaera       | 0.02% | 0.05% | 0.34% | 0.03% | 0.14% | 0.00% | 0.18% | 0.00% |
| Kouleothrix       | 0.00% | 1.00% | 0.16% | 0.00% | 0.00% | 0.00% | 0.00% | 0.00% |
| Roseiflexus       | 0.00% | 0.00% | 0.02% | 0.00% | 0.00% | 0.03% | 0.00% | 0.00% |
| vadinHB04         | 0.04% | 0.25% | 0.38% | 0.00% | 0.08% | 0.00% | 0.00% | 0.00% |
| Pigmentiphaga     | 0.00% | 0.00% | 0.00% | 0.00% | 0.30% | 0.03% | 0.00% | 0.00% |
| Kaistia           | 0.00% | 0.00% | 0.00% | 0.08% | 0.54% | 0.00% | 0.00% | 0.00% |
| Coprococcus       | 0.04% | 0.00% | 0.29% | 0.00% | 0.00% | 0.00% | 0.36% | 0.00% |
| Gallionella       | 0.00% | 0.00% | 0.00% | 0.30% | 0.16% | 0.00% | 0.00% | 0.00% |
| Desulfovibrio     | 0.00% | 0.10% | 0.20% | 0.09% | 0.03% | 0.00% | 0.27% | 0.02% |
| Bilophila         | 0.00% | 0.00% | 0.16% | 0.00% | 0.00% | 0.00% | 0.71% | 0.00% |
| Thiothrix         | 0.02% | 0.10% | 0.43% | 0.00% | 0.00% | 0.00% | 0.00% | 0.00% |
| Corynebacterium   | 0.02% | 0.10% | 0.00% | 0.00% | 0.22% | 0.01% | 0.18% | 0.02% |



|                  |       |       |       |       |       |       |       |       |
|------------------|-------|-------|-------|-------|-------|-------|-------|-------|
| Flavobacterium   | 0.16% | 0.00% | 0.00% | 0.03% | 0.19% | 0.01% | 0.00% | 0.05% |
| Anaeromyxobacter | 0.43% | 0.10% | 0.00% | 0.00% | 0.00% | 0.00% | 0.00% | 0.00% |
| Lachnospira      | 0.00% | 0.10% | 0.02% | 0.00% | 0.00% | 0.04% | 0.00% | 0.00% |
| Blvii28          | 0.00% | 0.00% | 0.00% | 0.27% | 0.08% | 0.00% | 0.00% | 0.00% |
| Dehalobacterium  | 0.02% | 0.00% | 0.04% | 0.00% | 0.00% | 0.00% | 0.76% | 0.00% |
| Rhodococcus      | 0.00% | 0.00% | 0.00% | 0.08% | 0.14% | 0.00% | 0.00% | 0.07% |
| Enhydrobacter    | 0.07% | 0.00% | 0.34% | 0.00% | 0.03% | 0.00% | 0.00% | 0.00% |
| Chryseobacterium | 0.00% | 0.00% | 0.00% | 0.00% | 0.14% | 0.00% | 0.00% | 0.00% |
| Turneriella      | 0.09% | 0.05% | 0.02% | 0.02% | 0.27% | 0.00% | 0.00% | 0.02% |
| SHD-231          | 0.27% | 0.00% | 0.16% | 0.00% | 0.00% | 0.00% | 0.00% | 0.00% |
| Odoribacter      | 0.00% | 0.00% | 0.11% | 0.00% | 0.00% | 0.00% | 0.58% | 0.00% |
| Simplicispira    | 0.00% | 0.25% | 0.02% | 0.00% | 0.00% | 0.00% | 0.09% | 0.14% |
| Megamonas        | 0.04% | 0.05% | 0.22% | 0.00% | 0.03% | 0.00% | 0.00% | 0.00% |
| Arenimonas       | 0.00% | 0.00% | 0.00% | 0.16% | 0.19% | 0.00% | 0.00% | 0.00% |
| Roseburia        | 0.00% | 0.00% | 0.00% | 0.00% | 0.00% | 0.03% | 0.00% | 0.07% |
| Propionivibrio   | 0.02% | 0.00% | 0.07% | 0.16% | 0.05% | 0.00% | 0.00% | 0.00% |
| Anaerospira      | 0.07% | 0.00% | 0.00% | 0.03% | 0.19% | 0.00% | 0.00% | 0.00% |
| Tepidimonas      | 0.00% | 0.00% | 0.00% | 0.09% | 0.19% | 0.00% | 0.00% | 0.02% |
| Parabacteroides  | 0.00% | 0.00% | 0.09% | 0.00% | 0.00% | 0.01% | 0.31% | 0.00% |
| Diaphorobacter   | 0.00% | 0.35% | 0.13% | 0.00% | 0.00% | 0.00% | 0.00% | 0.02% |
| Azoarcus         | 0.09% | 0.25% | 0.00% | 0.06% | 0.00% | 0.00% | 0.00% | 0.00% |
| Iamia            | 0.00% | 0.00% | 0.00% | 0.05% | 0.00% | 0.00% | 0.09% | 0.09% |
| Inquilinus       | 0.00% | 0.00% | 0.09% | 0.00% | 0.03% | 0.01% | 0.04% | 0.00% |
| Sulfuritalea     | 0.00% | 0.40% | 0.02% | 0.00% | 0.11% | 0.00% | 0.04% | 0.00% |
| Hylemonella      | 0.07% | 0.10% | 0.07% | 0.03% | 0.03% | 0.01% | 0.00% | 0.00% |
| Tatlockia        | 0.00% | 0.00% | 0.00% | 0.00% | 0.00% | 0.03% | 0.00% | 0.00% |
| AF12             | 0.00% | 0.00% | 0.04% | 0.02% | 0.00% | 0.00% | 0.49% | 0.00% |
| za29             | 0.00% | 0.00% | 0.00% | 0.14% | 0.14% | 0.00% | 0.00% | 0.00% |

|                   |       |       |       |       |       |       |       |       |
|-------------------|-------|-------|-------|-------|-------|-------|-------|-------|
| Arcobacter        | 0.00% | 0.00% | 0.07% | 0.05% | 0.14% | 0.00% | 0.00% | 0.00% |
| Sutterella        | 0.00% | 0.00% | 0.00% | 0.00% | 0.00% | 0.03% | 0.00% | 0.00% |
| Methylobacterium  | 0.04% | 0.00% | 0.00% | 0.09% | 0.00% | 0.00% | 0.09% | 0.00% |
| Thermus           | 0.04% | 0.00% | 0.00% | 0.03% | 0.19% | 0.00% | 0.04% | 0.00% |
| Legionella        | 0.02% | 0.00% | 0.00% | 0.00% | 0.03% | 0.00% | 0.09% | 0.12% |
| Bacillus          | 0.00% | 0.00% | 0.00% | 0.00% | 0.05% | 0.02% | 0.04% | 0.00% |
| GW-34             | 0.07% | 0.05% | 0.11% | 0.00% | 0.05% | 0.00% | 0.00% | 0.00% |
| Pleomorphomonas   | 0.02% | 0.00% | 0.09% | 0.09% | 0.00% | 0.00% | 0.00% | 0.00% |
| Shewanella        | 0.04% | 0.00% | 0.02% | 0.00% | 0.19% | 0.00% | 0.00% | 0.00% |
| Nannocystis       | 0.04% | 0.15% | 0.11% | 0.00% | 0.00% | 0.00% | 0.00% | 0.00% |
| Ramlibacter       | 0.02% | 0.15% | 0.04% | 0.00% | 0.03% | 0.00% | 0.00% | 0.00% |
| Anaeromusa        | 0.00% | 0.10% | 0.13% | 0.02% | 0.00% | 0.00% | 0.00% | 0.00% |
| Blautia           | 0.00% | 0.05% | 0.02% | 0.05% | 0.00% | 0.01% | 0.00% | 0.00% |
| Haliscomenobacter | 0.09% | 0.05% | 0.09% | 0.00% | 0.00% | 0.00% | 0.00% | 0.00% |
| Rikenella         | 0.00% | 0.00% | 0.02% | 0.00% | 0.00% | 0.00% | 0.36% | 0.00% |
| KD1-23            | 0.09% | 0.15% | 0.00% | 0.03% | 0.00% | 0.00% | 0.00% | 0.00% |
| Nostocoida        | 0.02% | 0.05% | 0.13% | 0.00% | 0.00% | 0.00% | 0.00% | 0.00% |
| Sphingopyxis      | 0.02% | 0.05% | 0.00% | 0.00% | 0.00% | 0.01% | 0.00% | 0.00% |
| Methylopila       | 0.09% | 0.00% | 0.09% | 0.00% | 0.00% | 0.00% | 0.00% | 0.00% |
| Fluviicola        | 0.00% | 0.00% | 0.00% | 0.05% | 0.05% | 0.00% | 0.04% | 0.05% |
| Stenotrophomonas  | 0.04% | 0.05% | 0.02% | 0.02% | 0.00% | 0.00% | 0.00% | 0.00% |
| Pseudonocardia    | 0.00% | 0.00% | 0.00% | 0.06% | 0.00% | 0.00% | 0.00% | 0.02% |
| Bradyrhizobium    | 0.09% | 0.00% | 0.00% | 0.03% | 0.00% | 0.00% | 0.00% | 0.00% |
| Brochothrix       | 0.02% | 0.00% | 0.00% | 0.03% | 0.08% | 0.00% | 0.00% | 0.00% |
| CF231             | 0.00% | 0.00% | 0.00% | 0.00% | 0.00% | 0.00% | 0.31% | 0.00% |
| Actinomyces       | 0.00% | 0.05% | 0.07% | 0.05% | 0.00% | 0.00% | 0.00% | 0.00% |
| Sedimentibacter   | 0.00% | 0.00% | 0.00% | 0.05% | 0.05% | 0.00% | 0.00% | 0.02% |
| Propionibacterium | 0.00% | 0.00% | 0.02% | 0.00% | 0.08% | 0.00% | 0.04% | 0.02% |

|                   |       |       |       |       |       |       |       |       |
|-------------------|-------|-------|-------|-------|-------|-------|-------|-------|
| Chelatococcus     | 0.00% | 0.00% | 0.00% | 0.03% | 0.14% | 0.00% | 0.00% | 0.00% |
| Meiothermus       | 0.00% | 0.15% | 0.07% | 0.00% | 0.00% | 0.00% | 0.00% | 0.00% |
| N09               | 0.00% | 0.05% | 0.04% | 0.00% | 0.03% | 0.00% | 0.00% | 0.05% |
| Desulfomonile     | 0.00% | 0.00% | 0.00% | 0.06% | 0.05% | 0.00% | 0.00% | 0.00% |
| Muricauda         | 0.00% | 0.00% | 0.00% | 0.00% | 0.00% | 0.00% | 0.09% | 0.05% |
| Pseudoxanthomonas | 0.02% | 0.10% | 0.04% | 0.02% | 0.00% | 0.00% | 0.00% | 0.00% |
| Agrobacterium     | 0.07% | 0.00% | 0.02% | 0.00% | 0.03% | 0.00% | 0.00% | 0.00% |
| Azospirillum      | 0.02% | 0.00% | 0.00% | 0.00% | 0.00% | 0.00% | 0.00% | 0.00% |
| Luteibacter       | 0.00% | 0.00% | 0.02% | 0.00% | 0.00% | 0.00% | 0.22% | 0.00% |
| Leptonema         | 0.00% | 0.15% | 0.00% | 0.02% | 0.05% | 0.00% | 0.00% | 0.00% |
| Succiniclasticum  | 0.02% | 0.10% | 0.00% | 0.05% | 0.00% | 0.00% | 0.00% | 0.00% |
| Roseateles        | 0.09% | 0.05% | 0.02% | 0.00% | 0.00% | 0.00% | 0.00% | 0.00% |
| Lysobacter        | 0.00% | 0.00% | 0.07% | 0.00% | 0.00% | 0.00% | 0.00% | 0.00% |
| Syntrophobacter   | 0.07% | 0.00% | 0.00% | 0.03% | 0.00% | 0.00% | 0.00% | 0.00% |
| Streptomyces      | 0.02% | 0.00% | 0.04% | 0.00% | 0.00% | 0.00% | 0.00% | 0.00% |
| C39               | 0.00% | 0.10% | 0.00% | 0.03% | 0.00% | 0.00% | 0.00% | 0.00% |
| Actinotalea       | 0.00% | 0.00% | 0.02% | 0.00% | 0.00% | 0.00% | 0.09% | 0.00% |
| Sulfurospirillum  | 0.00% | 0.00% | 0.00% | 0.00% | 0.08% | 0.00% | 0.00% | 0.00% |
| Staphylococcus    | 0.00% | 0.00% | 0.00% | 0.00% | 0.03% | 0.01% | 0.00% | 0.00% |
| Collinsella       | 0.02% | 0.00% | 0.02% | 0.00% | 0.05% | 0.00% | 0.00% | 0.00% |
| Akkermansia       | 0.00% | 0.00% | 0.02% | 0.00% | 0.00% | 0.00% | 0.13% | 0.00% |
| Turicibacter      | 0.00% | 0.00% | 0.00% | 0.02% | 0.05% | 0.00% | 0.00% | 0.00% |
| Z-35              | 0.00% | 0.00% | 0.00% | 0.05% | 0.00% | 0.00% | 0.00% | 0.00% |
| SJA-88            | 0.00% | 0.00% | 0.00% | 0.00% | 0.11% | 0.00% | 0.00% | 0.00% |
| Gordonia          | 0.04% | 0.05% | 0.00% | 0.00% | 0.00% | 0.00% | 0.00% | 0.00% |
| Pelotomaculum     | 0.00% | 0.10% | 0.04% | 0.00% | 0.00% | 0.00% | 0.00% | 0.00% |
| Isosphaera        | 0.02% | 0.05% | 0.02% | 0.00% | 0.00% | 0.00% | 0.00% | 0.00% |
| Niabella          | 0.02% | 0.00% | 0.04% | 0.00% | 0.00% | 0.00% | 0.00% | 0.00% |

|                  |       |       |       |       |       |       |       |       |
|------------------|-------|-------|-------|-------|-------|-------|-------|-------|
| Caldicoprobacter | 0.07% | 0.00% | 0.00% | 0.00% | 0.00% | 0.00% | 0.00% | 0.00% |
| Syntrophomonas   | 0.02% | 0.05% | 0.02% | 0.00% | 0.00% | 0.00% | 0.00% | 0.00% |
| Cryocola         | 0.00% | 0.00% | 0.00% | 0.00% | 0.00% | 0.00% | 0.00% | 0.05% |
| Gallicola        | 0.02% | 0.05% | 0.02% | 0.00% | 0.00% | 0.00% | 0.00% | 0.00% |
| Acidaminobacter  | 0.00% | 0.00% | 0.00% | 0.00% | 0.00% | 0.00% | 0.00% | 0.07% |
| Luteimonas       | 0.00% | 0.00% | 0.00% | 0.00% | 0.05% | 0.00% | 0.00% | 0.00% |
| Rothia           | 0.00% | 0.00% | 0.00% | 0.05% | 0.00% | 0.00% | 0.00% | 0.00% |
| Neisseria        | 0.00% | 0.00% | 0.00% | 0.00% | 0.08% | 0.00% | 0.00% | 0.00% |
| Leadbetterella   | 0.00% | 0.15% | 0.00% | 0.00% | 0.00% | 0.00% | 0.00% | 0.00% |
| Yonghaparkia     | 0.00% | 0.00% | 0.00% | 0.00% | 0.00% | 0.00% | 0.04% | 0.02% |
| Klebsiella       | 0.00% | 0.00% | 0.04% | 0.00% | 0.00% | 0.00% | 0.00% | 0.00% |
| Methylomonas     | 0.00% | 0.10% | 0.00% | 0.00% | 0.00% | 0.00% | 0.00% | 0.00% |
| Prostheco bacter | 0.00% | 0.00% | 0.00% | 0.00% | 0.00% | 0.00% | 0.04% | 0.00% |
| Desulfobacter    | 0.00% | 0.00% | 0.00% | 0.00% | 0.05% | 0.00% | 0.00% | 0.00% |
| Enterococcus     | 0.02% | 0.00% | 0.00% | 0.02% | 0.00% | 0.00% | 0.00% | 0.00% |
| Clavibacter      | 0.00% | 0.00% | 0.00% | 0.00% | 0.00% | 0.00% | 0.00% | 0.02% |
| Anaerostipes     | 0.00% | 0.00% | 0.02% | 0.00% | 0.00% | 0.00% | 0.04% | 0.00% |
| Amaricoccus      | 0.04% | 0.00% | 0.00% | 0.00% | 0.00% | 0.00% | 0.00% | 0.00% |
| Dialister        | 0.02% | 0.00% | 0.00% | 0.02% | 0.00% | 0.00% | 0.00% | 0.00% |
| Chloronema       | 0.00% | 0.00% | 0.04% | 0.00% | 0.00% | 0.00% | 0.00% | 0.00% |
| Xylanimicrobium  | 0.00% | 0.00% | 0.00% | 0.03% | 0.00% | 0.00% | 0.00% | 0.00% |
| Anaerovibrio     | 0.00% | 0.00% | 0.00% | 0.00% | 0.00% | 0.00% | 0.09% | 0.00% |
| Fusobacterium    | 0.00% | 0.05% | 0.00% | 0.00% | 0.00% | 0.00% | 0.00% | 0.00% |
| Ignavibacterium  | 0.00% | 0.00% | 0.00% | 0.02% | 0.03% | 0.00% | 0.00% | 0.00% |
| SMB53            | 0.02% | 0.00% | 0.00% | 0.00% | 0.03% | 0.00% | 0.00% | 0.00% |
| Guggenheimella   | 0.00% | 0.00% | 0.04% | 0.00% | 0.00% | 0.00% | 0.00% | 0.00% |
| Mycoplana        | 0.00% | 0.00% | 0.04% | 0.00% | 0.00% | 0.00% | 0.00% | 0.00% |
| Gemmata          | 0.00% | 0.00% | 0.00% | 0.02% | 0.03% | 0.00% | 0.00% | 0.00% |

|                              |       |       |       |       |       |       |       |       |
|------------------------------|-------|-------|-------|-------|-------|-------|-------|-------|
| Anaerobiospirillum           | 0.00% | 0.00% | 0.00% | 0.00% | 0.00% | 0.00% | 0.09% | 0.00% |
| Cellvibrio                   | 0.00% | 0.00% | 0.02% | 0.00% | 0.03% | 0.00% | 0.00% | 0.00% |
| Paucibacter                  | 0.04% | 0.00% | 0.00% | 0.00% | 0.00% | 0.00% | 0.00% | 0.00% |
| Gemmatimonas                 | 0.00% | 0.10% | 0.00% | 0.00% | 0.00% | 0.00% | 0.00% | 0.00% |
| Acidaminococcus              | 0.00% | 0.00% | 0.04% | 0.00% | 0.00% | 0.00% | 0.00% | 0.00% |
| rc4-4                        | 0.00% | 0.00% | 0.04% | 0.00% | 0.00% | 0.00% | 0.00% | 0.00% |
| Azohydromonas                | 0.00% | 0.00% | 0.02% | 0.00% | 0.00% | 0.00% | 0.00% | 0.02% |
| Anaerofilum                  | 0.00% | 0.05% | 0.00% | 0.00% | 0.03% | 0.00% | 0.00% | 0.00% |
| Oscillochloris               | 0.02% | 0.05% | 0.00% | 0.00% | 0.00% | 0.00% | 0.00% | 0.00% |
| Shinella                     | 0.02% | 0.00% | 0.00% | 0.00% | 0.03% | 0.00% | 0.00% | 0.00% |
| Giesbergeria                 | 0.00% | 0.00% | 0.02% | 0.00% | 0.00% | 0.00% | 0.00% | 0.00% |
| Pseudoramibacter_Eubacterium | 0.02% | 0.00% | 0.02% | 0.00% | 0.00% | 0.00% | 0.00% | 0.00% |
| Atopobium                    | 0.00% | 0.00% | 0.04% | 0.00% | 0.00% | 0.00% | 0.00% | 0.00% |
| Lewinella                    | 0.00% | 0.00% | 0.00% | 0.00% | 0.05% | 0.00% | 0.00% | 0.00% |
| Trichococcus                 | 0.00% | 0.00% | 0.04% | 0.00% | 0.00% | 0.00% | 0.00% | 0.00% |
| Geothrix                     | 0.00% | 0.00% | 0.00% | 0.00% | 0.00% | 0.00% | 0.00% | 0.02% |
| Thiomonas                    | 0.02% | 0.05% | 0.00% | 0.00% | 0.00% | 0.00% | 0.00% | 0.00% |

Supporting material 3

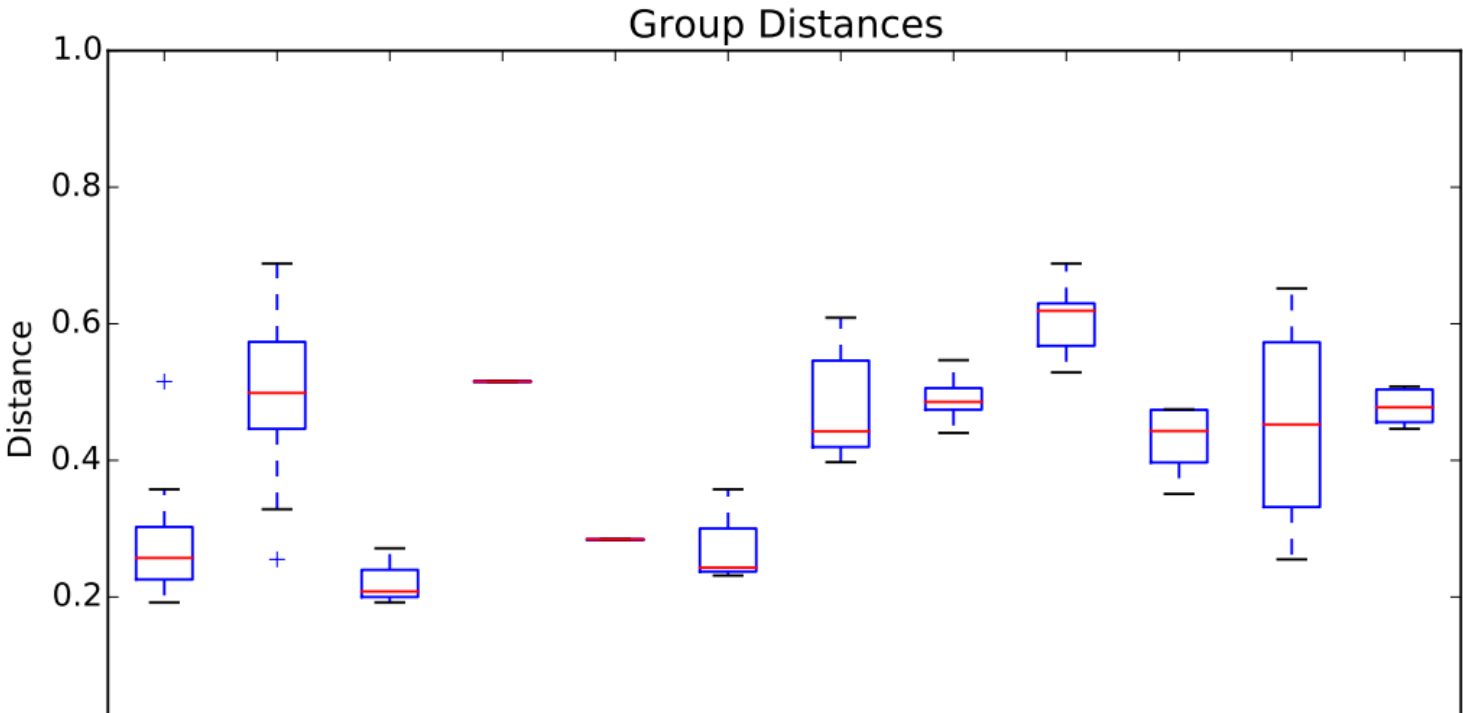

Supplement: 41598_2018_22683_MOESM1_ESM.pdf [file 41598_2018_22683_MOESM1_ESM.pdf]
